# Supplementary material for: Alkynylation/dearomatizative cyclization to construct spiro[5.5]undecanes
Source: Royal Society of Chemistry journal article supplement (doi:10.1039/c6ra02463g), 2016-01-01

## Supporting Information

### Alkynylation/De aromatizative Cyclization to Construct Spiro[5.5]undecanes

Jidong Shao,<sup>a</sup> Liqi Li,<sup>\*a</sup> Jie Zhang,<sup>b</sup> Jingping Hu,<sup>a</sup> Jijun Xue,<sup>a</sup> and Ying  
Li<sup>\*a</sup>

<sup>a</sup> State Key Laboratory of Applied Organic Chemistry & College of Chemistry and  
Chemical Engineering, Lanzhou University, Lanzhou, 730000, P. R. China

<sup>b</sup> State Key Laboratory of Fluorine & Nitrogen Chemicals, Xi'an Modern Chemistry  
Research Institute, Xi'an, 710065, P. R. China

Fax: +86-931-8912582; E-mail: lilq@lzu.edu.cn; liying@lzu.edu.cn.

### Table of Contents

|                                                  |     |
|--------------------------------------------------|-----|
| General Information.....                         | S 2 |
| Experimental Procedures and Analytical Data..... | S 2 |
| NMR Spectra of Compounds.....                    | S 9 |

## General Information

All reactions under standard conditions were monitored by thin-layer chromatography (TLC) on GF254 plates. The silica gel (200-300 meshes) was used for column chromatography, and the distillation range of petro ether was 60- 90°C. CH<sub>2</sub>Cl<sub>2</sub> was dried by distillation over CaH<sub>2</sub>. Benzene and THF was dried by distillation over Na/K alloy. CH<sub>3</sub>NO<sub>2</sub> was distilled over anhydrous CaCl<sub>2</sub> and further dried over 4Å molecular sieve. Commercially available reagents and solvents were used without any purification. <sup>1</sup>H and <sup>13</sup>C NMR spectra were recorded in CDCl<sub>3</sub> solution on Bruker AX-400 MHz instruments and spectral data were reported in ppm relative to tetramethylsilane (TMS) as internal standard. High-resolution mass spectral analysis (HRMS) data were measured on the Bruker Apex II by means of the ESI technique.

## Experimental Procedures and Analytical Data

**Preparation of 5a.** Cu(OTf)<sub>2</sub> (21.2mg, 0.0588mmol) was added in dry CH<sub>2</sub>Cl<sub>2</sub> (2.0ml) under Ar atmosphere. Then, ZnMe<sub>2</sub> in toluene (1.2M, 3.06ml) was added. After 10min, **2a** (245μL, 2.94mmol) was added. 2 h later, the solution was cooled to 0 °C and treated with compound **1a** (112mg, 0.735mmol) dissolved in CH<sub>2</sub>Cl<sub>2</sub> (2.0ml). The resulting mixture was stirred at room temperature for 12h. After the reaction was completed (monitoring with TLC), it was quenched with saturated aqueous NH<sub>4</sub>Cl solution. The mixture was extracted with EtOAc (3×20 mL). The organic layers were washed with brine, dried over Na<sub>2</sub>SO<sub>4</sub>, and concentrated under vacuum. The residue was purified by flash column chromatography to afford compound **5a** as a light yellow liquid (147mg, 90%yeild).

**2-(1-hydroxy-4-methoxybut-2-yn-1-yl)-4-methoxyphenol (5a).** <sup>1</sup>H NMR (400 MHz, CDCl<sub>3</sub>) δ 7.03 (s, 1H), 6.91 (d, 1H, *J* = 2.8Hz), 6.75-6.82 (m, 2H), 5.67 (s, 1H), 4.18 (d, 2H, *J* = 1.2Hz), 3.75 (s, 3H), 3.39 (s, 3H). <sup>13</sup>C NMR (100 MHz, CDCl<sub>3</sub>) δ 153.1, 148.7, 125.5, 117.6, 114.9, 113.3, 84.6, 83.4, 63.4, 59.9, 57.7, 55.8.

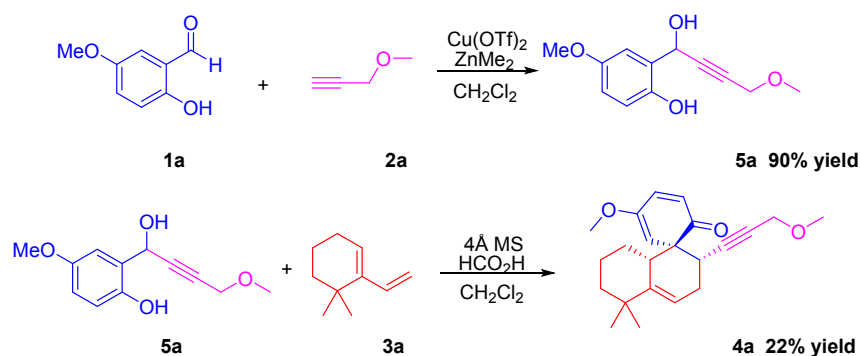

**General procedure.** Cu(OTf)<sub>2</sub> (21.2mg, 0.0588mmol) was added in dry CH<sub>2</sub>Cl<sub>2</sub> (2.0ml) under Ar atmosphere. Then, ZnMe<sub>2</sub> in toluene (1.2M, 3.06ml) was added. After 10min, terminal alkyne (2.94mmol) was added. 2 h later, the solution was cooled to 0 °C and treated with substituted

salicylaldehyde (0.735mmol) dissolved in CH<sub>2</sub>Cl<sub>2</sub> (2.0ml). The resulting mixture was stirred at room temperature for 12h. After salicylaldehyde was disappeared (monitoring with TLC), the solution was opened to atmosphere, 4 Å molecular sieve and functionalized 1, 3-butadiene (3.675mmol) was added. 5min later, dropped HCO<sub>2</sub>H (1.10mmol). The mixture was stirred 12h at room temperature and filtered through short diatomite columns to afford crude product. Further purification by flash column chromatography afforded product.

***3-methoxy-2'-(3-methoxyprop-1-yn-1-yl)-5',5'-dimethyl-3',5',6',7',8',8a'-hexahydro-2'H-spiro[cyclohexane-1,1'-naphthalene]-2,4-dien-6-one (4a).***

The title compound was obtained in 46% yield as a light yellow solid. m.p. 102-104°C. <sup>1</sup>H NMR (400 MHz, CDCl<sub>3</sub>) δ 6.84 (dd, 1H, *J*=3.2Hz, *J*=10.0Hz), 6.09 (d, 1H, *J*=10.0Hz), 5.51-5.52 (m, 1H), 5.15 (d, 1H, *J*=3.2Hz), 3.94 (t, 2H, *J*=1.8Hz), 3.66 (s, 3H), 3.23 (s, 3H), 2.85-2.89 (m, 2H), 2.27-2.32 (m, 2H), 1.46-1.55 (m, 1H), 1.37-1.43 (m, 3H), 1.14-1.22 (m, 2H), 1.11 (s, 3H), 1.05 (s, 3H). <sup>13</sup>C NMR (100 MHz, CDCl<sub>3</sub>) δ 205.9, 152.4, 145.3, 141.4, 127.6, 114.3, 104.7, 86.2, 76.8, 59.7, 56.9, 55.6, 55.0, 44.2, 40.2, 37.1, 36.1, 29.9, 29.4, 28.8, 28.6, 21.1. IR[*v*<sub>max</sub> cm<sup>-1</sup>] 3263, 3051, 2924, 2849, 2666, 2367, 2222, 1993, 1871, 1783, 1718, 1670, 1638, 1587, 1461, 1408, 1363, 1237, 1188, 1096, 1040, 1004, 906, 829, 773, 738, 691, 605, 539, 489, 455. MS-ESI: *m/z* = 358 [M+NH<sub>4</sub>]<sup>+</sup>. HRMS-ESI (*m/z*): [M+Na]<sup>+</sup> calcd 363.1931; found 363.1936.

***2'-(3-methoxyprop-1-yn-1-yl)-3,5',5'-trimethyl-3',5',6',7',8',8a'-hexahydro-2'H-spiro[cyclohexane-1,1'-naphthalene]-2,4-dien-6-one (4b).***

The title compound was obtained in 36% yield as a light yellow liquid. <sup>1</sup>H NMR (400 MHz, CDCl<sub>3</sub>) δ 6.86 (dd, 1H, *J*=2.2Hz, *J*=9.8Hz), 6.05-6.08 (m, 2H), 5.51-5.53 (m, 1H), 3.94 (dd, 2H, *J*=2.0Hz, *J*=3.2Hz), 3.24 (s, 3H), 2.84-2.90 (m, 2H), 2.27-2.31 (m, 2H), 2.01 (d, 3H, *J*=1.2Hz), 1.36-1.52 (m, 5H), 1.16-1.24 (m, 1H), 1.11 (s, 3H), 1.05 (s, 3H). <sup>13</sup>C NMR (100 MHz, CDCl<sub>3</sub>) δ 206.5, 145.4, 145.2, 135.6, 131.5, 126.4, 114.4, 86.3, 77.2, 59.8, 56.9, 56.7, 44.2, 40.2, 36.6, 36.1, 29.9, 29.5, 28.8, 28.5, 21.5, 21.2. IR[*v*<sub>max</sub> cm<sup>-1</sup>] 3274, 3050, 2925, 2866, 2821, 2372, 2230, 1990, 1871, 1719, 1670, 1640, 1570, 1450, 1408, 1381, 1357, 1258, 1231, 1188, 1137, 1097, 1042, 1004, 947, 906, 824, 767, 737, 703, 643, 600, 507, 490, 437. MS-ESI: *m/z* = 342 [M+NH<sub>4</sub>]<sup>+</sup>. HRMS-ESI (*m/z*): [M+Na]<sup>+</sup> calcd 347.1982; found 347.1987.

***2'-(3-methoxyprop-1-yn-1-yl)-5',5'-dimethyl-3',5',6',7',8',8a'-hexahydro-2'H-spiro[cyclohexane-1,1'-naphthalene]-2,4-dien-6-one (4c).***

The title compound was obtained in 20% yield as a light yellow liquid. <sup>1</sup>H NMR (400 MHz, CDCl<sub>3</sub>) δ 6.99-7.03 (m, 1H), 6.41-6.48 (m, 2H), 6.10 (d, 1H, *J*=9.6Hz), 5.52-5.54 (m, 1H), 3.94 (t, 2H, *J*=1.6Hz), 3.25 (s, 3H), 2.89-2.96 (m, 2H), 2.27-2.34 (m, 2H), 1.37-1.49 (m, 4H), 1.15-1.25 (m, 2H), 1.10 (s, 3H), 1.05 (s, 3H). <sup>13</sup>C NMR (150 MHz, CDCl<sub>3</sub>) δ 206.4, 145.1, 141.8, 141.1, 126.8, 124.2, 114.5, 85.9, 76.9, 59.8, 57.8, 57.2, 44.1, 40.2, 36.6, 36.2, 30.0, 29.6, 28.8, 28.5, 21.2. IR[*v*<sub>max</sub> cm<sup>-1</sup>] 3381, 3045, 2925, 2853, 2726, 2376, 2235, 1718, 1660, 1631, 1608, 1562, 1508, 1460, 1418, 1378, 1364, 1304, 1234, 1189, 1098, 1028, 1002, 951, 905, 822, 770, 736, 691, 640, 600, 525, 497. MS-ESI: *m/z* = 328 [M+NH<sub>4</sub>]<sup>+</sup>. HRMS-ESI (*m/z*): [M+Na]<sup>+</sup> calcd 333.1825; found 333.1830.

***3-bromo-2'-(3-methoxyprop-1-yn-1-yl)-5',5'-dimethyl-3',5',6',7',8',8a'-hexahydro-2'H-spiro[cyclohexane-1,1'-naphthalene]-2,4-dien-6-one (4d)***

The title compound was obtained in 28% yield as a light yellow liquid. <sup>1</sup>H NMR (400 MHz, CDCl<sub>3</sub>) δ 7.00 (dd, 1H, *J*=2.4Hz, *J*=10.0Hz), 6.60 (d, 1H, *J*=2.4Hz), 6.04 (d, 1H, *J*=10.0Hz), 5.52-5.54 (m, 1H), 3.97 (s, 2H), 3.28 (s, 3H), 2.86-2.90 (m, 2H), 2.22-2.39 (m, 2H), 1.38-1.54 (m, 4H), 1.19-1.26 (m, 2H), 1.11 (s, 3H), 1.04 (s, 3H). <sup>13</sup>C NMR (100 MHz, CDCl<sub>3</sub>) δ 203.8, 144.8, 144.7, 140.7, 128.2, 116.0, 114.5, 85.3, 77.7, 60.7, 59.8, 57.2, 44.3, 40.1, 36.8, 36.2, 29.9, 29.5, 28.9, 28.7, 21.2. IR[*v*<sub>max</sub> cm<sup>-1</sup>] 3314, 3052, 2925, 2852, 2368, 2234, 1719, 1665, 1617, 1563, 1509, 1463, 1415, 1380, 1363, 1329, 1272, 1223, 1189, 1152, 1098, 1028, 1003, 946, 905, 848, 822, 795, 736, 706, 647, 600, 559, 505. MS-ESI: *m/z* = 411 [M+Na]<sup>+</sup>. HRMS-ESI (*m/z*): [M+Na]<sup>+</sup> calcd 411.0930; found 411.0934.

***3-chloro-2'-(3-methoxyprop-1-yn-1-yl)-5',5'-dimethyl-3',5',6',7',8',8a'-hexahydro-2'H-spiro[cyclohexane-1,1'-naphthalene]-2,4-dien-6-one (4e)***

The title compound was obtained in 22% yield as a light yellow liquid. <sup>1</sup>H NMR (400 MHz, CDCl<sub>3</sub>) δ 6.90 (dd, 1H, *J*=2.8Hz, *J*=10.0Hz), 6.39 (d, 1H, *J*=2.8Hz), 6.11 (d, 1H, *J*=10.0Hz), 5.52-5.54 (m, 1H), 3.97 (t, 2H, *J*=1.4Hz), 3.27 (s, 3H), 2.87-2.92 (m, 2H), 2.26-2.34 (m, 2H), 1.38-1.50 (m, 4H), 1.14-1.26 (m, 2H), 1.11 (s, 3H), 1.04 (s, 3H). <sup>13</sup>C NMR (100 MHz, CDCl<sub>3</sub>) δ 204.1, 144.8, 143.1, 136.3, 128.2, 128.1, 114.5, 85.3, 77.7, 59.8, 59.2, 57.1, 44.5, 40.1, 36.9, 36.2, 29.9, 29.5, 28.9, 28.7, 21.1. IR[*v*<sub>max</sub> cm<sup>-1</sup>] 3318, 3052, 2926, 2852, 2725, 2368, 2235, 1720, 1666, 1623, 1569, 1534, 1462, 1393, 1379, 1364, 1330, 1259, 1224, 1189, 1150, 1099, 1052, 1028, 1003, 948, 906, 855, 822, 737, 653, 619, 567, 506. MS-ESI: *m/z* = 362 [M+NH<sub>4</sub>]<sup>+</sup>. HRMS-ESI (*m/z*):

[M+Na]<sup>+</sup> calcd 367.1435; found 367.1440.

***ethyl-2'-(3-methoxyprop-1-yn-1-yl)-5',5'-dimethyl-6-oxo-3',5',6',7',8',8a'-hexahydro-2'H-spiro[cyclohexane-1,1'-naphthalene]-2,4-diene-3-carboxylate (4f)***

The title compound was obtained in 5% yield as a light yellow liquid. <sup>1</sup>H NMR (400 MHz, CDCl<sub>3</sub>) δ 7.54 (dd, 1H, *J*=2.4Hz, *J*=10.0Hz), 7.44 (d, 1H, *J*=2.0Hz), 6.19 (d, 1H, *J*=10.0Hz), 5.58-5.59 (m, 1H), 4.32 (q, 2H, *J*=7.2Hz), 3.92 (d, 2H, *J*=1.2Hz), 3.21 (s, 3H), 2.96-3.02 (m, 2H), 2.32-2.37 (m, 2H), 1.42-1.49 (m, 4H), 1.37 (t, 3H, *J*=7.2Hz), 1.19-1.23 (m, 2H), 1.13 (s, 3H), 1.06 (s, 3H). <sup>13</sup>C NMR (100 MHz, CDCl<sub>3</sub>) δ 204.8, 164.4, 150.2, 144.8, 138.7, 128.8, 127.0, 114.7, 85.2, 77.7, 61.4, 59.8, 57.8, 57.1, 44.4, 40.0, 37.0, 36.3, 29.9, 29.5, 29.3, 28.7, 21.3, 14.3. IR[*v*<sub>max</sub> cm<sup>-1</sup>] 3317, 3053, 2926, 2853, 2726, 2593, 2375, 1720, 1666, 1638, 1611, 1579, 1545, 1461, 1412, 1366, 1276, 1254, 1225, 1191, 1098, 1063, 1025, 953, 906, 867, 825, 769, 735, 705, 645, 608, 550, 498. MS-ESI: *m/z* = 405 [M+Na]<sup>+</sup>. HRMS-ESI (*m/z*): [M+Na]<sup>+</sup> calcd 405.2036; found 405.2041.

***2'-(hept-1-yn-1-yl)-3,4-dimethoxy-5',5'-dimethyl-3',5',6',7',8',8a'-hexahydro-2'H-spiro[cyclohexane-1,1'-naphthalene]-2,4-dien-6-one (4g)***

The title compound was obtained in 53% yield as a white solid. m.p. 85-87°C. <sup>1</sup>H NMR (400 MHz, CDCl<sub>3</sub>) δ 5.56 (s, 1H), 5.50-5.51 (m, 1H), 5.23 (s, 1H), 3.82 (s, 3H), 3.73 (s, 3H), 2.91-2.94 (m, 1H), 2.80-2.85 (m, 1H), 2.16-2.34 (m, 2H), 1.97-2.01 (m, 2H), 1.51-1.55 (m, 1H), 1.30-1.43 (m, 5H), 1.14-1.25 (m, 6H), 1.10 (s, 3H), 1.05 (s, 3H), 0.87 (t, 3H, *J*=6.8Hz). <sup>13</sup>C NMR (100 MHz, CDCl<sub>3</sub>) δ 203.7, 166.4, 148.4, 145.4, 114.5, 107.7, 102.6, 81.6, 79.5, 56.3, 55.9, 55.5, 43.3, 40.3, 36.8, 36.1, 30.8, 30.5, 29.5, 28.9, 28.8, 28.6, 22.1, 21.2, 18.6, 13.9. IR[*v*<sub>max</sub> cm<sup>-1</sup>] 3255, 3162, 2928, 2860, 2726, 2664, 2377, 2236, 2099, 1871, 1635, 1586, 1454, 1404, 1349, 1319, 1251, 1232, 1189, 1174, 1139, 1071, 1044, 1002, 949, 916, 836, 798, 733, 684, 648, 538, 514, 495, 460. MS-ESI: *m/z* = 397 [M+H]<sup>+</sup>. HRMS-ESI (*m/z*): [M+Na]<sup>+</sup> calcd 419.2557; found 419.2560. HPLC on Daicel Chiralpak AS-H, Hexanes / IPA = 90 / 10, 1.0 mL/min<sup>-1</sup>, λ = 220 nm, *t* (minor 1) = 4.919 min, *t* (major 1) = 5.714 min, *t* (minor 2) = 7.280 min, *t* (major 2) = 8.030 min.

***2'-(hept-1-yn-1-yl)-3-methoxy-5',5'-dimethyl-3',5',6',7',8',8a'-hexahydro-2'H-spiro[cyclohexane-1,1'-naphthalene]-2,4-dien-6-one (4h)***

The title compound was obtained in 42% yield as a light yellow liquid. <sup>1</sup>H NMR (400 MHz, CDCl<sub>3</sub>) δ 6.81 (dd, 1H, *J*=3.2Hz, *J*=10.0Hz), 6.06 (d, 1H, *J*=10.0Hz), 5.50-5.51 (m, 1H), 5.15 (d, 1H, *J*=2.8Hz), 3.66 (s, 3H), 2.87-2.90 (m, 1H), 2.75-2.79 (m, 1H), 2.21-2.27 (m, 2H), 1.97-2.01

(m, 2H), 1.46-1.54 (m, 1H), 1.31-1.40 (m, 5H), 1.12-1.26 (m, 6H), 1.10 (s, 3H), 1.05 (s, 3H), 0.88 (t, 3H,  $J=6.8\text{Hz}$ ).  $^{13}\text{C}$  NMR (100 MHz,  $\text{CDCl}_3$ )  $\delta$  206.4, 152.4, 145.3, 141.3, 127.8, 114.6, 105.2, 81.6, 79.4, 56.1, 55.0, 44.2, 40.3, 37.3, 36.1, 30.8, 30.5, 29.5, 28.9, 28.8, 28.5, 22.2, 21.2, 18.5, 13.9. IR [ $\nu_{\text{max}}$   $\text{cm}^{-1}$ ] 3276, 3166, 3049, 2927, 2861, 2666, 2379, 2223, 1947, 1718, 1670, 1640, 1588, 1460, 1407, 1381, 1364, 1327, 1236, 1219, 1182, 1125, 1043, 1016, 979, 896, 828, 797, 778, 730, 690, 624, 532, 488, 458. MS-ESI:  $m/z = 367$   $[\text{M}+\text{H}]^+$ . HRMS-ESI ( $m/z$ ):  $[\text{M}+\text{H}]^+$  calcd 367.2632; found 367.2637.

***2'-(cyclopropylethynyl)-3-methoxy-5',5'-dimethyl-3',5',6',7',8',8a'-hexahydro-2'H-spiro[cyclohexane-1,1'-naphthalene]-2,4-dien-6-one (4i).***

The title compound was obtained in 32% yield as a light yellow solid. m.p. 86-88°C  $^1\text{H}$  NMR (400 MHz,  $\text{CDCl}_3$ )  $\delta$  6.81 (dd, 1H,  $J=3.2\text{Hz}$ ,  $J=10.0\text{Hz}$ ), 6.05 (d, 1H,  $J=10.0\text{Hz}$ ), 5.48-5.50 (m, 1H), 5.12 (d, 1H,  $J=2.8\text{Hz}$ ), 3.66 (s, 3H), 2.88-2.90 (m, 1H), 2.69-2.73 (m, 1H), 2.19-2.25 (m, 2H), 1.46-1.54 (m, 1H), 1.34-1.43 (m, 3H), 1.14-1.21 (m, 2H), 1.10 (s, 3H), 1.00-1.05 (m, 4H), 0.59-0.63 (m, 2H), 0.41-0.45 (m, 2H).  $^{13}\text{C}$  NMR (100 MHz,  $\text{CDCl}_3$ )  $\delta$  206.2, 152.4, 145.2, 141.3, 127.8, 114.5, 105.2, 84.7, 74.6, 56.2, 55.1, 44.0, 40.3, 37.4, 36.1, 30.4, 29.5, 28.9, 21.2, 8.2, 8.0, -0.6. IR [ $\nu_{\text{max}}$   $\text{cm}^{-1}$ ] 3401, 3091, 3007, 2927, 2866, 2664, 2370, 2210, 1892, 1736, 1670, 1640, 1587, 1460, 1407, 1364, 1324, 1257, 1235, 1181, 1124, 1039, 978, 901, 828, 797, 748, 690, 622, 545, 490, 448. MS-ESI:  $m/z = 337$   $[\text{M}+\text{H}]^+$ . HRMS-ESI ( $m/z$ ):  $[\text{M}+\text{H}]^+$  calcd 337.2162; found 337.2169. HPLC on Daicel Chiralpak AS-H, Hexanes / IPA = 90 / 10, 1.0 mL/min $^{-1}$ ,  $\lambda = 220$  nm, t (major 1) = 4.358 min, t (major 2) = 4.945 min, t (minor 1) = 5.980 min, t (minor 2) = 6.505 min.

***3-methoxy-5',5'-dimethyl-2'-(phenylethynyl)-3',5',6',7',8',8a'-hexahydro-2'H-spiro[cyclohexane-1,1'-naphthalene]-2,4-dien-6-one (4j).***

The title compound was obtained in 25% yield as a light yellow liquid.  $^1\text{H}$  NMR (400 MHz,  $\text{CDCl}_3$ )  $\delta$  7.22 (s, 5H), 6.87 (dd, 1H,  $J=2.8\text{Hz}$ ,  $J=10.4\text{Hz}$ ), 6.12 (d, 1H,  $J=10.4\text{Hz}$ ), 5.55-5.56 (m, 1H), 5.21 (d, 1H,  $J=2.8\text{Hz}$ ), 3.68 (s, 3H), 2.96-3.02 (m, 2H), 2.34-2.40 (m, 2H), 1.40-1.46 (m, 4H), 1.16-1.29 (m, 2H), 1.13 (s, 3H), 1.08 (s, 3H).  $^{13}\text{C}$  NMR (100 MHz,  $\text{CDCl}_3$ )  $\delta$  206.1, 152.6, 145.5, 141.5, 131.6, 128.1, 127.9, 127.6, 123.6, 114.4, 105.0, 89.4, 81.7, 56.0, 55.2, 44.0, 40.4, 37.9, 36.2, 30.0, 29.5, 28.9, 28.8, 21.2. IR [ $\nu_{\text{max}}$   $\text{cm}^{-1}$ ] 3368, 3053, 2926, 2854, 2725, 2376, 2200, 1952, 1720, 1669, 1639, 1588, 1489, 1460, 1407, 1379, 1236, 1167, 1123, 1035, 974, 913, 828, 798, 757, 692, 631, 536, 489. MS-ESI:  $m/z = 373$   $[\text{M}+\text{H}]^+$ . HRMS-ESI ( $m/z$ ):  $[\text{M}+\text{H}]^+$  calcd 373.2162; found

373.2168.

***3-methoxy-5',5'-dimethyl-2'-((trimethylsilyl)ethynyl)-3',5',6',7',8',8a'-hexahydro-2'H-spiro[cyclohexane-1,1'-naphthalene]-2,4-dien-6-one (4k).***

The title compound was obtained in 23% yield as a light yellow liquid. <sup>1</sup>H NMR (400 MHz, CDCl<sub>3</sub>) δ 6.82 (dd, 1H, *J*=2.8Hz, *J*=10.0Hz), 6.07 (d, 1H, *J*=10.0Hz), 5.49-5.51 (m, 1H), 5.13 (d, 1H, *J*=2.8Hz), 3.66 (s, 3H), 2.88-2.91 (m, 1H), 2.75-2.79 (m, 1H), 2.24-2.30 (m, 2H), 1.37-1.54 (m, 4H), 1.13-1.26 (m, 2H), 1.11 (s, 3H), 1.05 (s, 3H), 0.03 (s, 9H). <sup>13</sup>C NMR (100 MHz, CDCl<sub>3</sub>) δ 205.9, 152.6, 145.3, 141.5, 128.0, 114.2, 106.4, 104.9, 85.7, 56.0, 55.1, 43.9, 40.3, 38.2, 36.2, 30.0, 29.5, 28.9, 21.2, -0.02. IR[*v*<sub>max</sub> cm<sup>-1</sup>] 3398, 3051, 2927, 2855, 2663, 2373, 2174, 1946, 1785, 1736, 1671, 1641, 1588, 1460, 1407, 1381, 1323, 1250, 1236, 1182, 1123, 1040, 1007, 961, 895, 843, 797, 760, 694, 672, 628, 536, 489. MS-ESI: *m/z* = 369 [M+H]<sup>+</sup>. HRMS-ESI (*m/z*): [M+Na]<sup>+</sup> calcd 391.2064; found 391.2069.

***4-methoxy-11-(3-methoxyprop-1-yn-1-yl)-8,9-dimethylspiro[5.5]undeca-2,4,8-trien-1-one (4l-1).***

The title compound was obtained in 43% yield as a light yellow liquid. <sup>1</sup>H NMR (400 MHz, CDCl<sub>3</sub>) δ 6.86 (dd, 1H, *J*=2.8Hz, *J*=10.0Hz), 6.11 (d, 1H, *J*=10.0Hz), 5.25 (d, 1H, *J*=2.8Hz), 3.95 (t, 2H, *J*=1.8Hz), 3.63 (s, 3H), 3.24 (s, 3H), 3.00-3.06 (m, 1H), 2.53-2.57 (m, 1H), 2.24-2.27 (m, 2H), 1.76 (d, 1H, *J*=16Hz), 1.68 (s, 3H), 1.62 (s, 3H). <sup>13</sup>C NMR (100 MHz, CDCl<sub>3</sub>) δ 204.5, 151.8, 141.6, 127.6, 123.2, 123.0, 105.6, 86.6, 76.9, 59.8, 56.9, 55.0, 51.3, 42.3, 35.5, 35.3, 18.9, 18.5. IR[*v*<sub>max</sub> cm<sup>-1</sup>] 3331, 3050, 2909, 2840, 2733, 2230, 1990, 1720, 1669, 1641, 1587, 1449, 1406, 1356, 1313, 1261, 1237, 1210, 1186, 1147, 1096, 1022, 948, 907, 872, 828, 769, 737, 673, 627, 581, 540, 484. MS-ESI: *m/z* = 304 [M+NH<sub>4</sub>]<sup>+</sup>. HRMS-ESI (*m/z*): [M+Na]<sup>+</sup> calcd 309.1461; found 309.1467.

***6-methoxy-4-(3-methoxyprop-1-yn-1-yl)-2-methyl-2-(prop-1-en-2-yl)chromane (4l-2).***

The title compound was obtained in 37% yield as a light yellow liquid. <sup>1</sup>H NMR (400 MHz, CDCl<sub>3</sub>) δ 7.02 (d, 1H, *J*=2.4Hz), 6.73-6.79 (m, 2H), 5.12 (s, 1H), 4.89 (t, 1H, *J*=1.4Hz), 4.14 (d, 2H, *J*=2.0Hz), 3.90-3.94 (m, 1H), 3.77 (s, 3H), 3.39 (s, 3H), 2.20 (dd, 1H, *J*=5.6Hz, *J*=13.6Hz), 2.05 (dd, 1H, *J*=11.2Hz, *J*=13.6Hz), 1.86 (s, 3H), 1.36 (s, 3H). <sup>13</sup>C NMR (100 MHz, CDCl<sub>3</sub>) δ 153.3, 148.4, 146.8, 121.0, 118.0, 114.7, 113.2, 110.5, 87.5, 77.6, 77.5, 60.1, 57.5, 55.7, 37.5, 26.0, 22.9, 18.8. IR[*v*<sub>max</sub> cm<sup>-1</sup>] 3438, 3092, 2932, 2835, 2375, 2058, 1690, 1646, 1617, 1588, 1490, 1431, 1375, 1281, 1226, 1087, 1039, 964, 906, 817, 736, 704, 561, 491. MS-ESI: *m/z* = 304 [M+NH<sub>4</sub>]<sup>+</sup>.

HRMS-ESI (m/z): [M+Na]<sup>+</sup> calcd 309.1461; found 309.1469.

***4-methoxy-11-(3-methoxyprop-1-yn-1-yl)-8-methylspiro[5.5]undeca-2,4,8-trien-1-one (4m-1).***

The title compound was obtained in 30% yield as a light yellow liquid. <sup>1</sup>H NMR (400 MHz, CDCl<sub>3</sub>) δ 6.86 (dd, 1H, *J*=3.2Hz, *J*=10.0Hz), 6.11 (d, 1H, *J*=10.4Hz), 5.40-5.41 (m, 1H), 5.28 (d, 1H, *J*=3.2Hz), 3.95 (t, 2H, *J*=1.6Hz), 3.63 (s, 3H), 3.24 (s, 3H), 3.06-3.10 (m, 1H), 2.51-2.56 (m, 1H), 2.16-2.32 (m, 2H), 1.90 (dd, 1H, *J*=5.6Hz, *J*=17.2Hz), 1.73 (s, 3H). <sup>13</sup>C NMR (100 MHz, CDCl<sub>3</sub>) δ 204.7, 151.8, 141.6, 131.5, 127.6, 118.4, 105.4, 86.5, 77.2, 59.8, 57.0, 55.0, 50.3, 36.5, 35.4, 33.9, 22.9. IR[*v*<sub>max</sub> cm<sup>-1</sup>] 3332, 2926, 2851, 2731, 2372, 2230, 1980, 1721, 1668, 1642, 1587, 1449, 1407, 1358, 1332, 1258, 1235, 1208, 1186, 1137, 1098, 1026, 1003, 946, 912, 856, 829, 792, 768, 671, 560, 535, 489, 440. MS-ESI: m/z = 290 [M+NH<sub>4</sub>]<sup>+</sup>. HRMS-ESI (m/z): [M+Na]<sup>+</sup> calcd 295.1305; found 295.1311.

***6-methoxy-4-(3-methoxyprop-1-yn-1-yl)-2-methyl-2-vinylchromane (4m-2).***

The title compound was obtained in 35% yield as a light yellow liquid. <sup>1</sup>H NMR (400 MHz, CDCl<sub>3</sub>) δ 7.01 (s, 1H), 6.73-6.79 (m, 2H), 6.03 (dd, 1H, *J*=10.8Hz, *J*=17.6Hz), 5.33 (d, 1H, *J*=17.2Hz), 5.12 (d, 1H, *J*=11.2Hz), 4.13 (s, 2H), 3.91-3.95 (m, 1H), 3.77 (s, 3H), 3.38 (s, 3H), 2.15 (dd, 1H, *J*=6.0Hz, *J*=13.6Hz), 2.01 (dd, 1H, *J*=10.8Hz, *J*=13.6Hz), 1.33 (s, 3H). <sup>13</sup>C NMR (100 MHz, CDCl<sub>3</sub>) δ 153.4, 146.6, 142.5, 120.9, 118.1, 114.7, 113.4, 113.1, 87.6, 77.5, 75.5, 60.1, 57.4, 55.7, 38.5, 25.9, 23.4. IR[*v*<sub>max</sub> cm<sup>-1</sup>] 3417, 3088, 2930, 2836, 2596, 2378, 2237, 2060, 1854, 1736, 1689, 1618, 1489, 1431, 1375, 1284, 1221, 1096, 1038, 990, 929, 868, 818, 734, 705, 680, 555, 512. MS-ESI: m/z = 290 [M+NH<sub>4</sub>]<sup>+</sup>. HRMS-ESI (m/z): [M+Na]<sup>+</sup> calcd 295.1305; found 295.1308.

***4-methoxy-8-methyl-11-(phenylethynyl)spiro[5.5]undeca-2,4,8-trien-1-one (4n-1).*** The title compound was obtained in 23% yield as a light yellow liquid. <sup>1</sup>H NMR (400 MHz, CDCl<sub>3</sub>) δ 7.23(s, 5H), 6.91 (dd, 1H, *J*=2.8Hz, *J*=10.0Hz), 6.16 (d, 1H, *J*=10.0Hz), 5.43-5.44 (m, 1H), 5.33 (d, 1H, *J*=2.8Hz), 3.65 (s, 3H), 3.20 (dd, 1H, *J*=6.0Hz, *J*=11.6Hz), 2.60-2.65 (m, 1H), 2.24-2.40 (m, 2H), 1.94 (dd, 1H, *J*=5.2Hz, *J*=17.2Hz), 1.76 (s, 3H). <sup>13</sup>C NMR (100 MHz, CDCl<sub>3</sub>) δ 204.9, 151.9, 141.6, 131.5, 131.4, 128.0, 127.8, 127.6, 123.4, 118.4, 105.4, 89.4, 81.7, 55.0, 50.5, 36.3, 36.0, 33.9, 23.0. IR[*v*<sub>max</sub> cm<sup>-1</sup>] 3330, 3059, 2916, 2849, 2372, 2346, 2200, 1949, 1878, 1852, 1774, 1738, 1687, 1666, 1639, 1589, 1562, 1544, 1509, 1460, 1407, 1375, 1232, 1207, 1174, 1104, 1031, 854, 825, 789, 758, 724, 692, 535, 488.



MS-ESI:  $m/z = 305$   $[M+H]^+$ . HRMS-ESI ( $m/z$ ):  $[M+H]^+$  calcd 305.1536; found 305.1532.

***6-methoxy-2-methyl-4-(phenylethynyl)-2-vinylchromane (4n-2)***

The title compound was obtained in 44% yield as a light yellow liquid.  $^1\text{H}$  NMR (400 MHz,  $\text{CDCl}_3$ )  $\delta$  7.41-7.43 (m, 2H), 7.28-7.30 (m, 3H), 7.10 (d, 1H,  $J=2.4\text{Hz}$ ), 6.75-6.84 (m, 2H), 6.06 (dd, 1H,  $J=10.8\text{Hz}$ ,  $J=17.2\text{Hz}$ ), 5.36 (dd, 1H,  $J=0.8\text{Hz}$ ,  $J=17.2\text{Hz}$ ), 5.15 (dd, 1H,  $J=0.8\text{Hz}$ ,  $J=10.8\text{Hz}$ ), 4.10 (dd, 1H,  $J=6.0\text{Hz}$ ,  $J=10.4\text{Hz}$ ), 3.77 (s, 3H), 2.22 (dd, 1H,  $J=6.0\text{Hz}$ ,  $J=13.6\text{Hz}$ ), 2.11 (dd, 1H,  $J=10.4\text{Hz}$ ,  $J=13.6\text{Hz}$ ), 1.38 (s, 3H).;  $^{13}\text{C}$  NMR (100 MHz,  $\text{CDCl}_3$ )  $\delta$  153.3, 146.6, 142.5, 131.6, 128.2, 127.9, 123.3, 121.1, 118.1, 114.7, 113.4, 113.2, 90.5, 82.0, 75.6, 55.7, 38.4, 26.4, 23.5. IR [ $\nu_{\text{max}}$   $\text{cm}^{-1}$ ] 3059, 2929, 2855, 2375, 2226, 2066, 1954, 1878, 1689, 1598, 1492, 1427, 1373, 1266, 1219, 1146, 1093, 1039, 927, 911, 812, 757, 692, 531, 485. MS-ESI:  $m/z = 305$   $[M+H]^+$ . HRMS-ESI ( $m/z$ ):  $[M+H]^+$  calcd 305.1536; found 305.1529.

<sup>1</sup>H and <sup>13</sup>C NMR Spectra of Compound **5a**

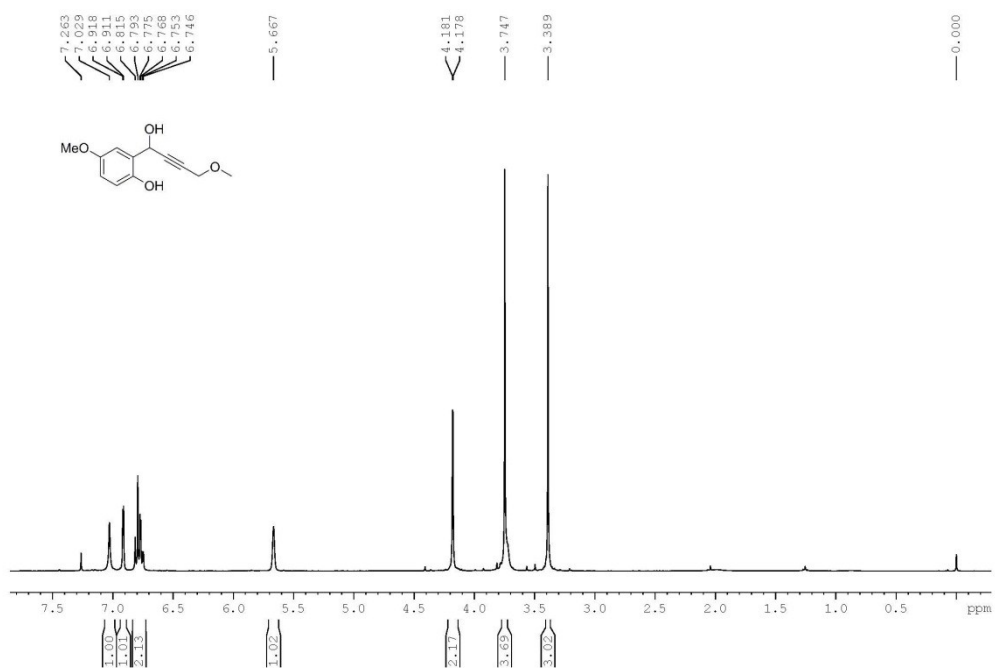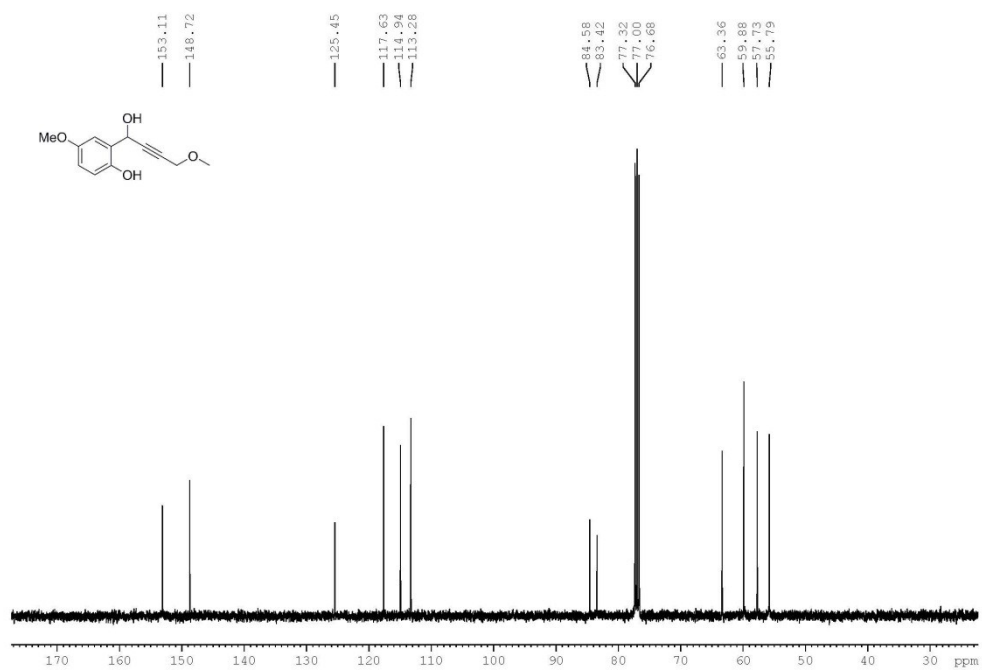

# <sup>1</sup>H and <sup>13</sup>C NMR Spectra of Compound 4a

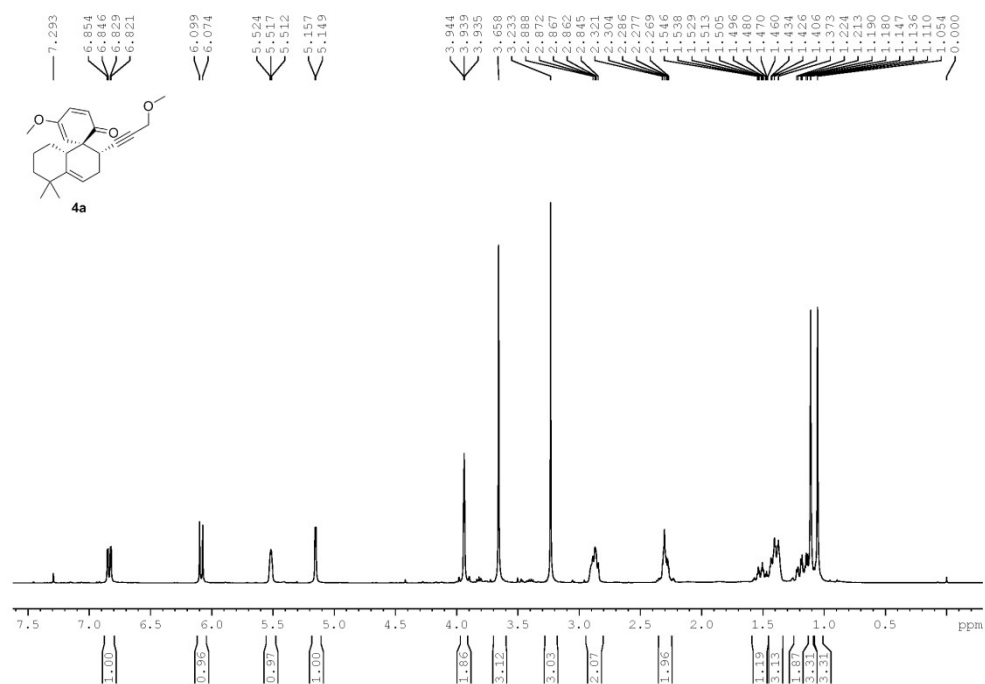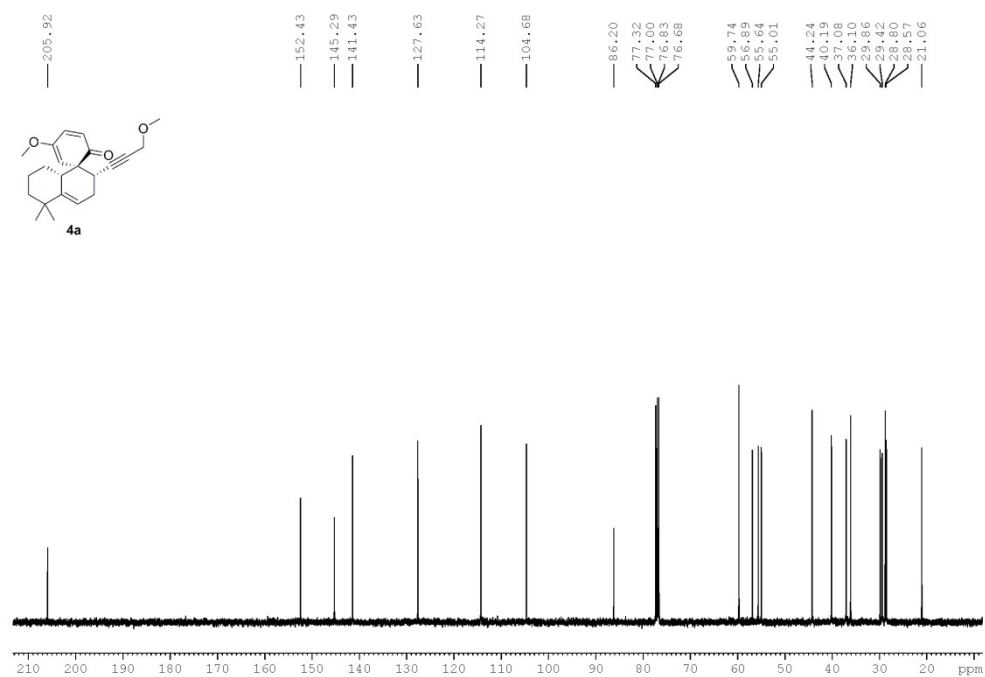

## X-ray Analysis of Compound 4a.

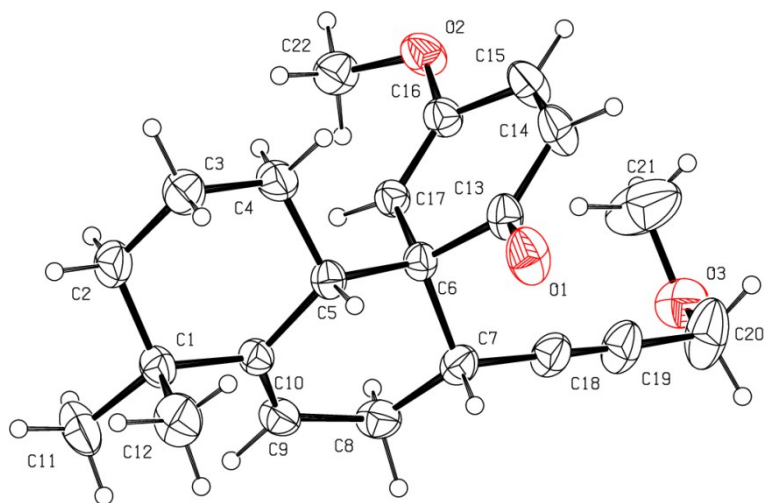

The crystallographic data of **4a** were summarized in the following table.

|                                |                                  |                    |                  |
|--------------------------------|----------------------------------|--------------------|------------------|
| Bond precision:                | C-C = 0.0032 Å                   | Wavelength=0.71073 |                  |
| Cell:                          | a=7.9086 (8)                     | b=9.3782 (9)       | c=13.0792 (8)    |
|                                | alpha=93.991 (6)                 | beta=93.766 (6)    | gamma=94.466 (8) |
| Temperature: 293 K             |                                  |                    |                  |
|                                | Calculated                       | Reported           |                  |
| Volume                         | 962.30 (15)                      | 962.30 (15)        |                  |
| Space group                    | P -1                             | P -1               |                  |
| Hall group                     | -P 1                             | -P 1               |                  |
| Moiety formula                 | C22 H28 O3                       | C22 H28 O3         |                  |
| Sum formula                    | C22 H28 O3                       | C22 H28 O3         |                  |
| Mr                             | 340.44                           | 340.44             |                  |
| Dx, g cm <sup>-3</sup>         | 1.175                            | 1.175              |                  |
| Z                              | 2                                | 2                  |                  |
| Mu (mm <sup>-1</sup> )         | 0.076                            | 0.076              |                  |
| F000                           | 368.0                            | 368.0              |                  |
| F000'                          | 368.17                           |                    |                  |
| h, k, lmax                     | 9, 11, 16                        | 9, 11, 16          |                  |
| Nref                           | 3801                             | 3788               |                  |
| Tmin, Tmax                     | 0.965, 0.977                     | 0.724, 1.000       |                  |
| Tmin'                          | 0.965                            |                    |                  |
| Correction method= MULTI-SCAN  |                                  |                    |                  |
| Data completeness= 0.997       | Theta(max)= 26.018               |                    |                  |
| R(reflections)= 0.0616 ( 2450) | wR2(reflections)= 0.1789 ( 3788) |                    |                  |
| S = 1.032                      | Npar= 231                        |                    |                  |

CIF file of **4a** can be obtained from the Cambridge Crystallographic Data Centre using deposition number CCDC 1447716. Copies of the data can be obtained, free of charge, on application to the CCDC, 12 Union Road, Cambridge CB2 1EZ, UK [fax:+44(1223)336033; e-mail: deposit@ccdc.cam.ac.uk].

<sup>1</sup>H and <sup>13</sup>C NMR Spectra of Compound **4b**

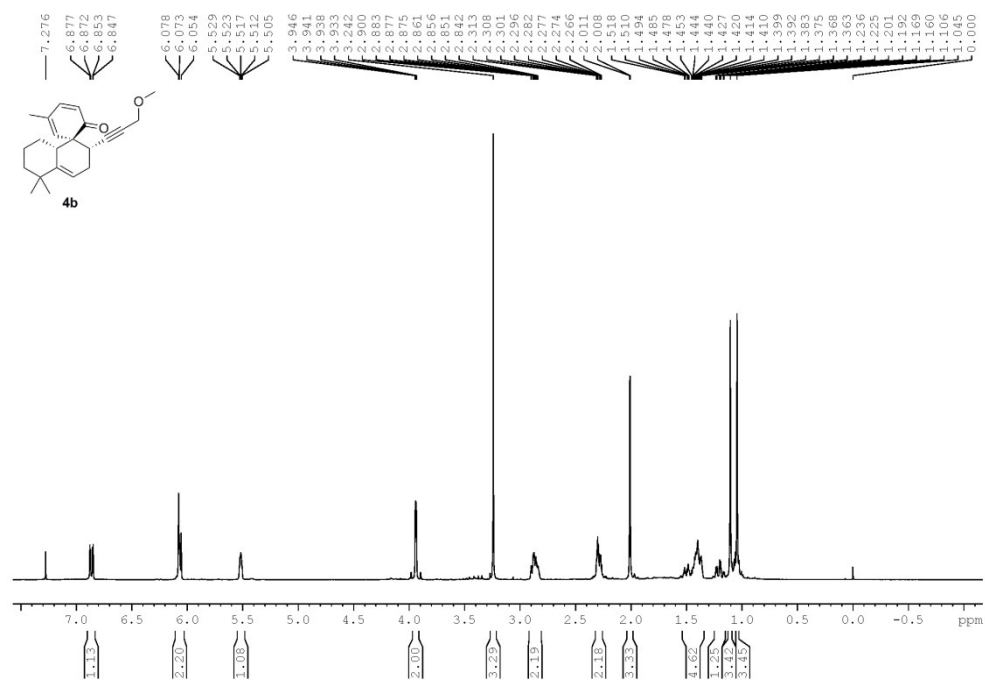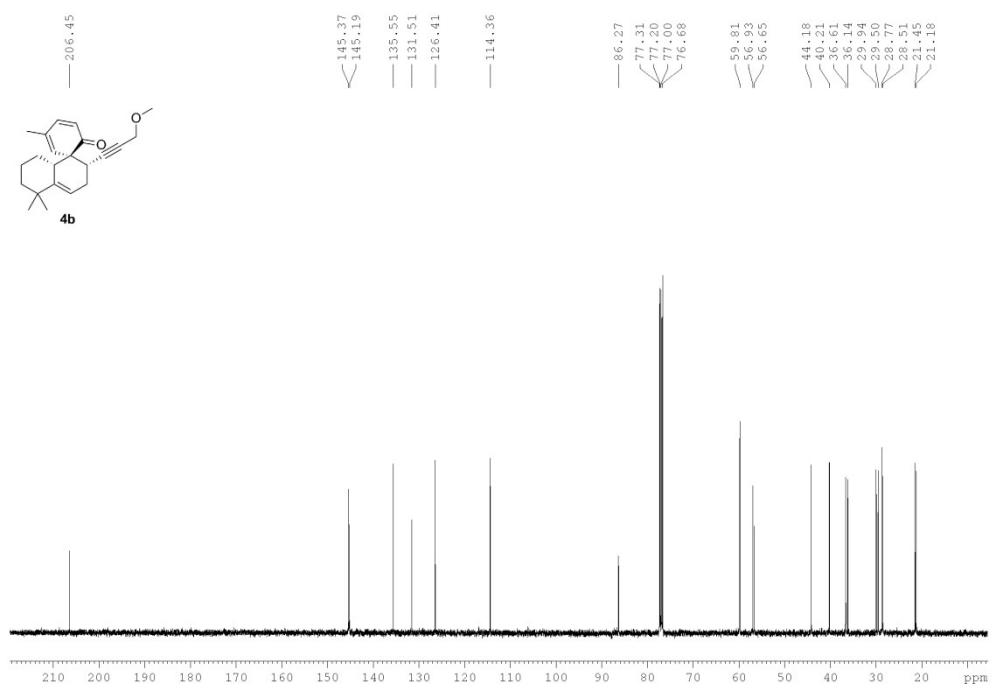

<sup>1</sup>H and <sup>13</sup>C NMR Spectra of Compound 4c

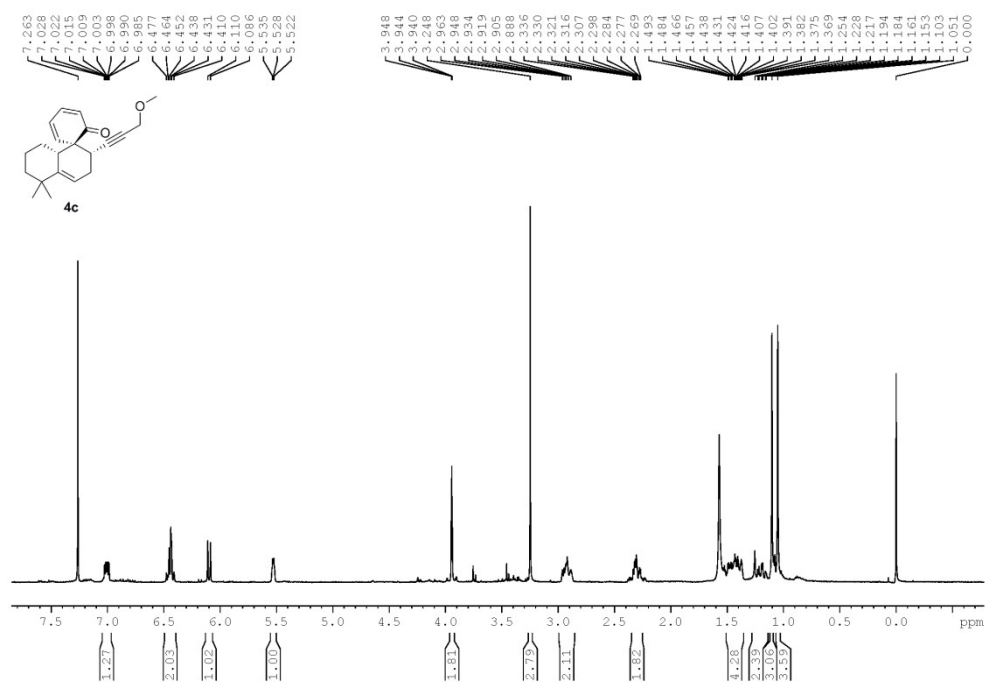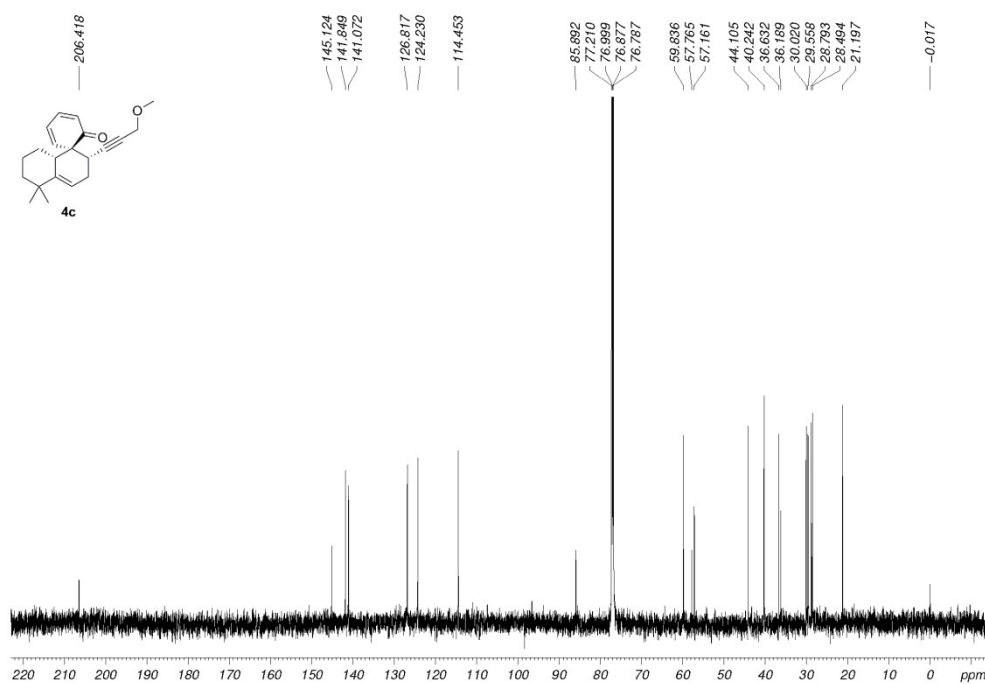

<sup>1</sup>H and <sup>13</sup>C NMR Spectra of Compound **4d**

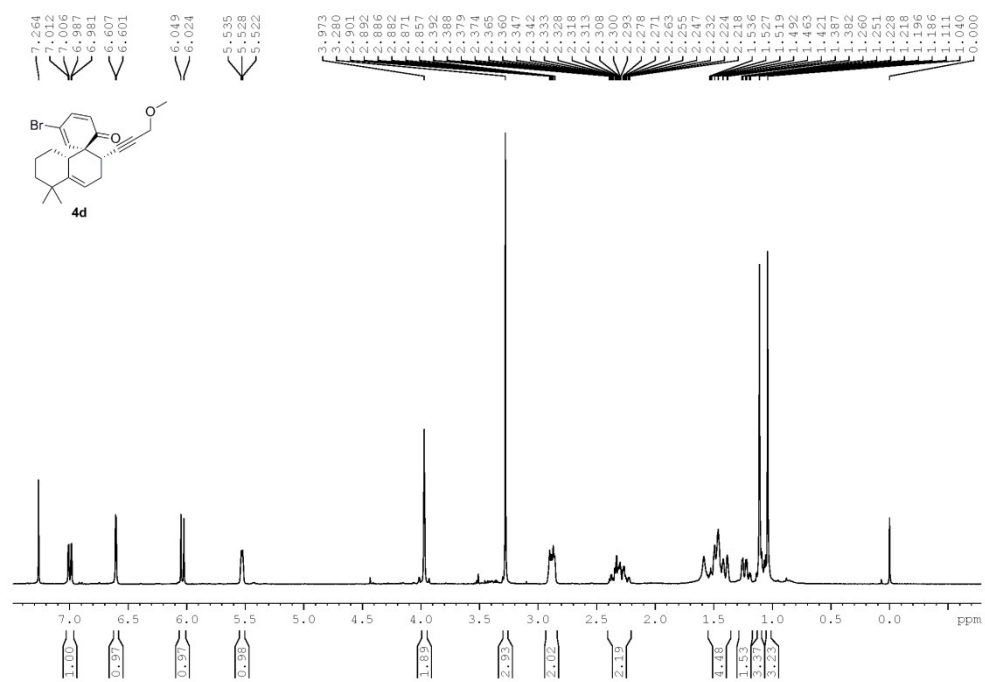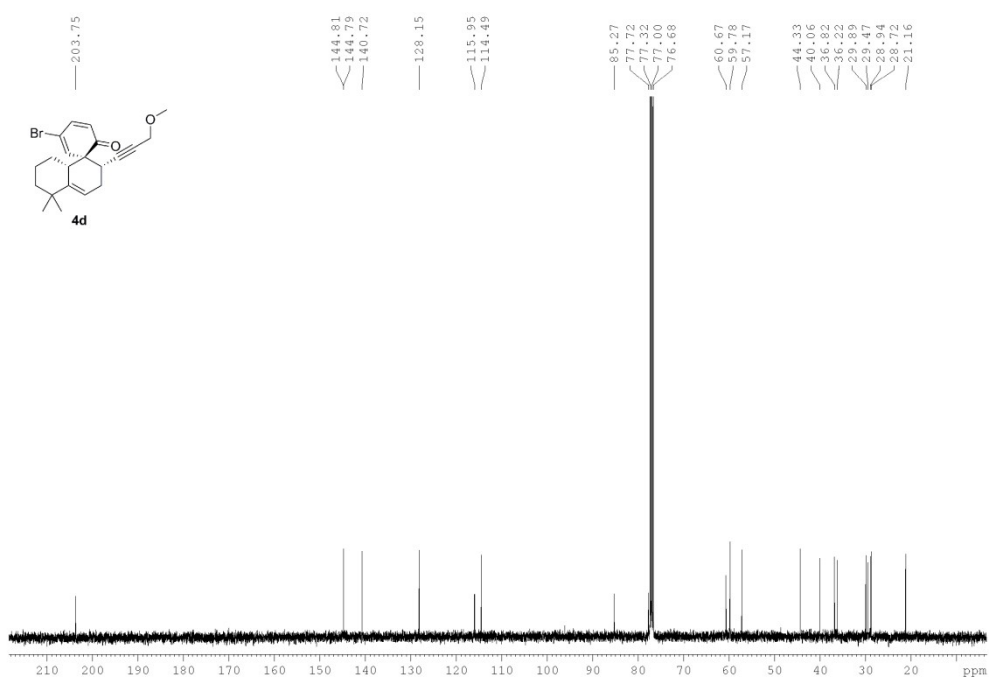

<sup>1</sup>H and <sup>13</sup>C NMR Spectra of Compound **4e**

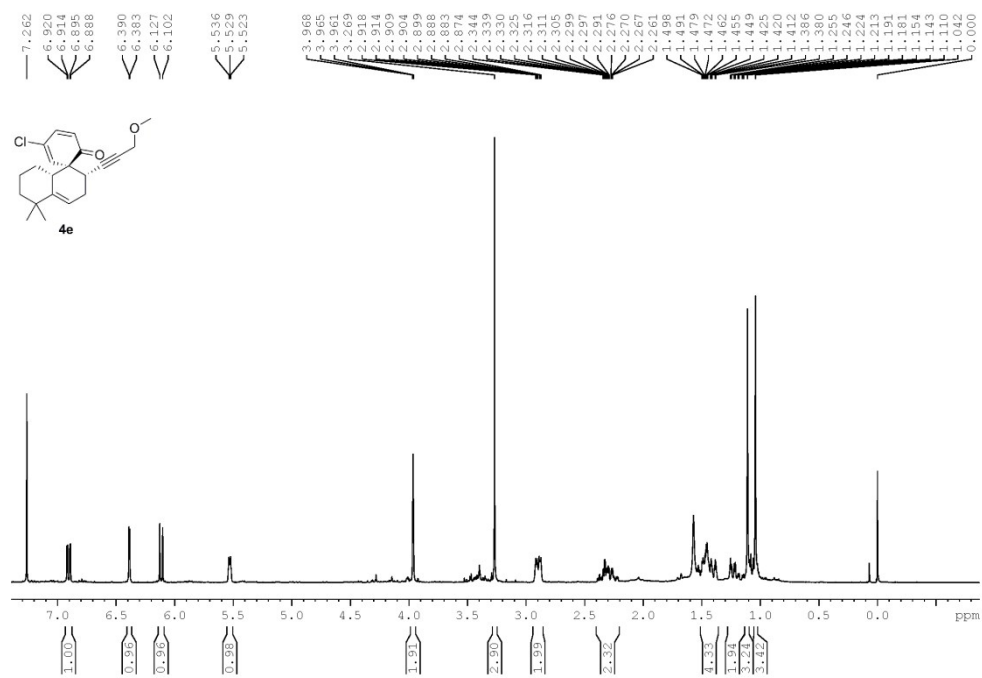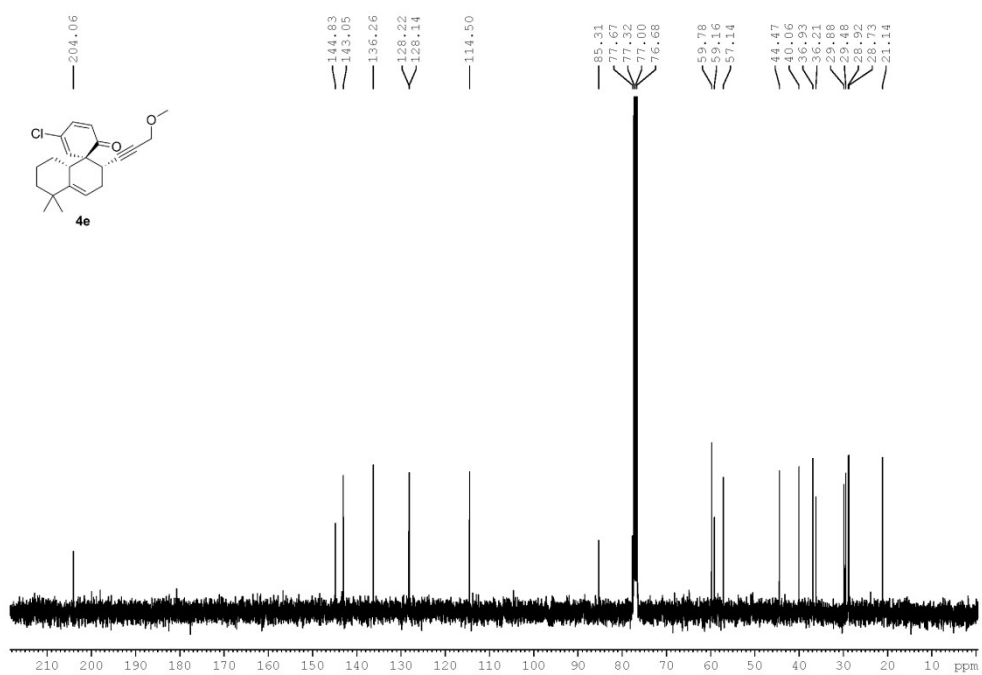



$^1\text{H}$  and  $^{13}\text{C}$  NMR Spectra of Compound **4f**

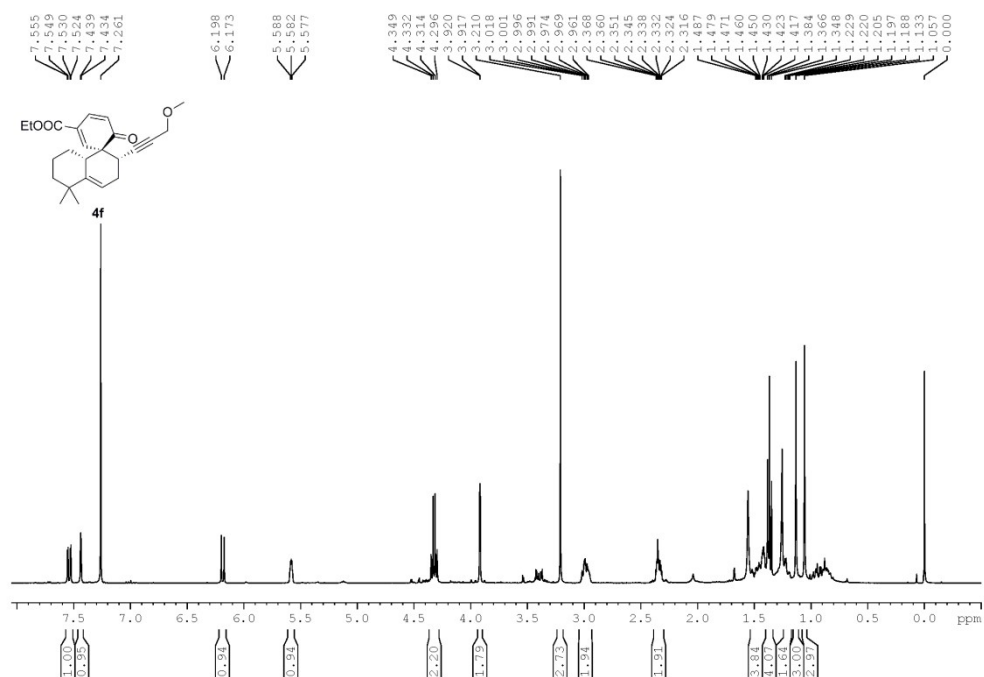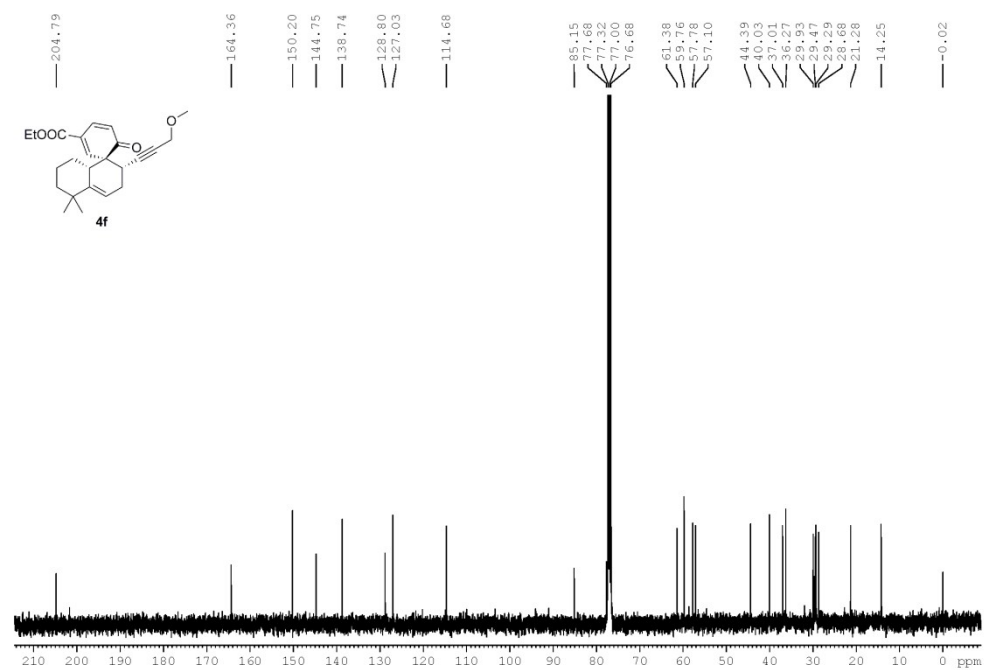

$^1\text{H}$  and  $^{13}\text{C}$  NMR Spectra of Compound **4g**

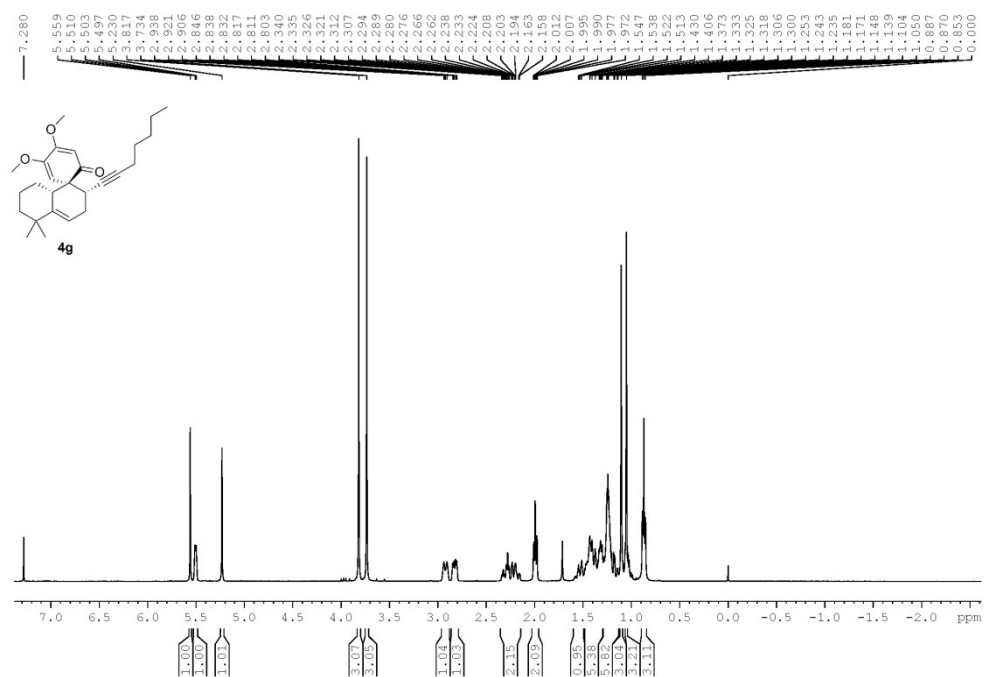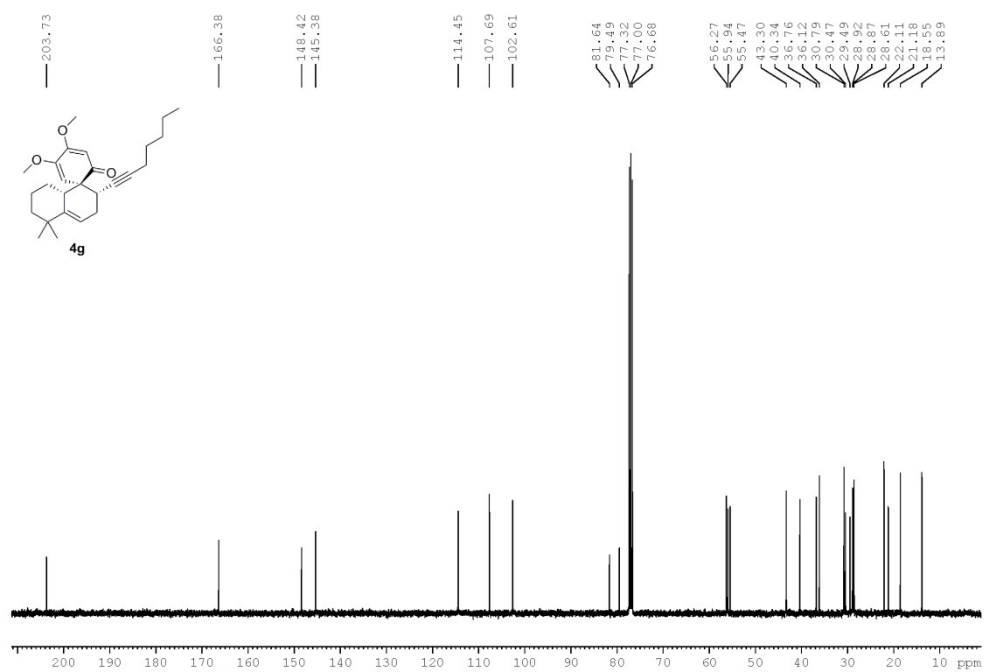

### HPLC Spectra of Compound 4g

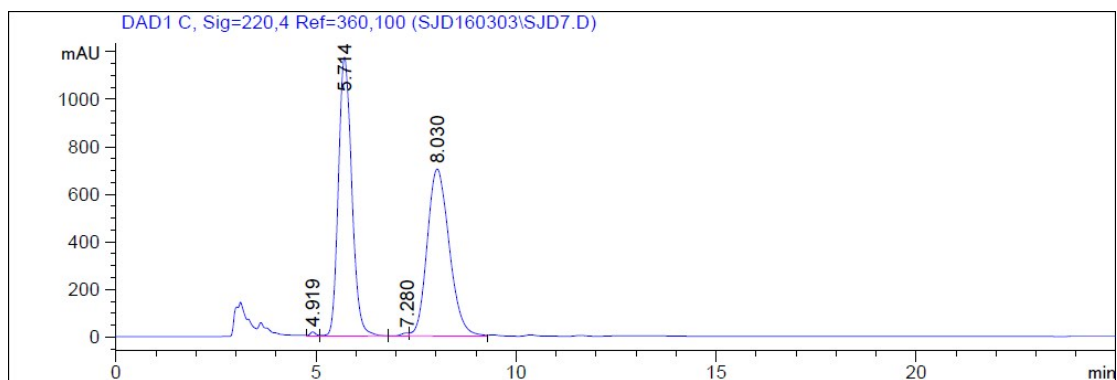

| 峰 # | 保留时间 [min] | 类型 | 峰宽 [min] | 峰面积 [mAU*s] | 峰面积 %   | 名称 |
|-----|------------|----|----------|-------------|---------|----|
| 1   | 4.919      | VV | 0.1500   | 182.33575   | 0.3336  | ?  |
| 2   | 5.714      | VB | 0.3635   | 2.72960e4   | 49.9474 | ?  |
| 3   | 7.280      | BV | 0.1930   | 152.86998   | 0.2797  | ?  |
| 4   | 8.030      | VV | 0.5988   | 2.70183e4   | 49.4392 | ?  |

总量 : 5.46495e4

### <sup>1</sup>H and <sup>13</sup>C NMR Spectra of Compound 4h

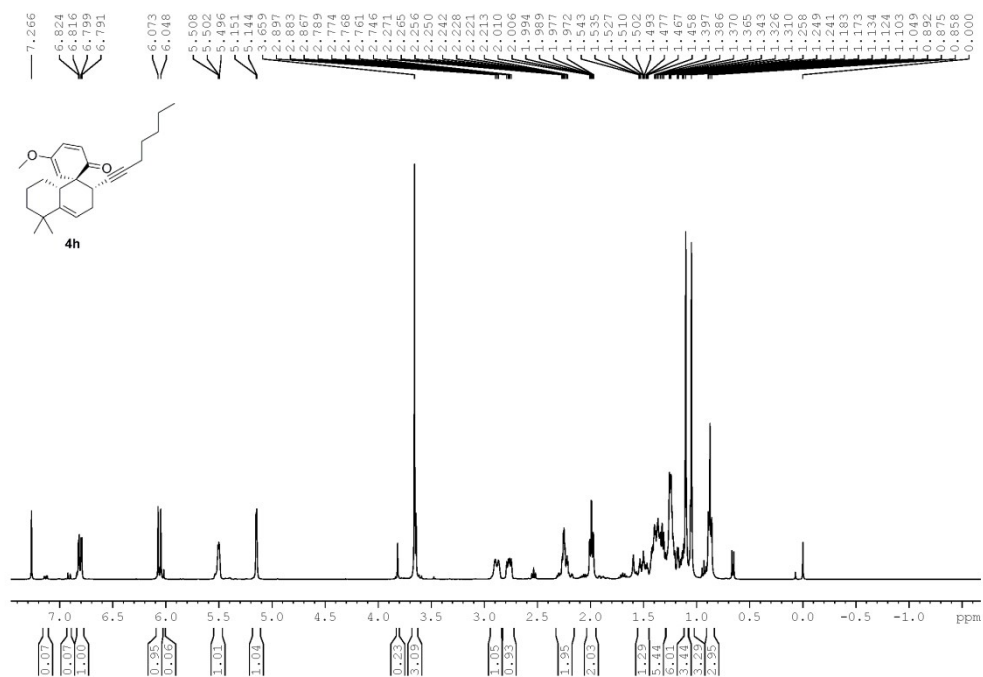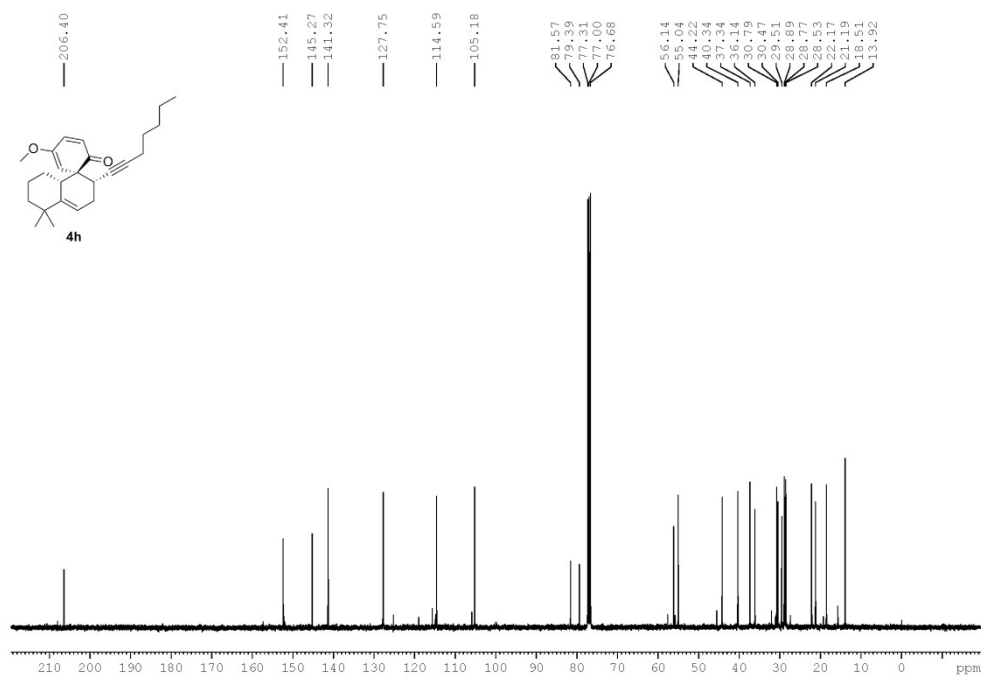

<sup>1</sup>H and <sup>13</sup>C NMR Spectra of Compound **4i**

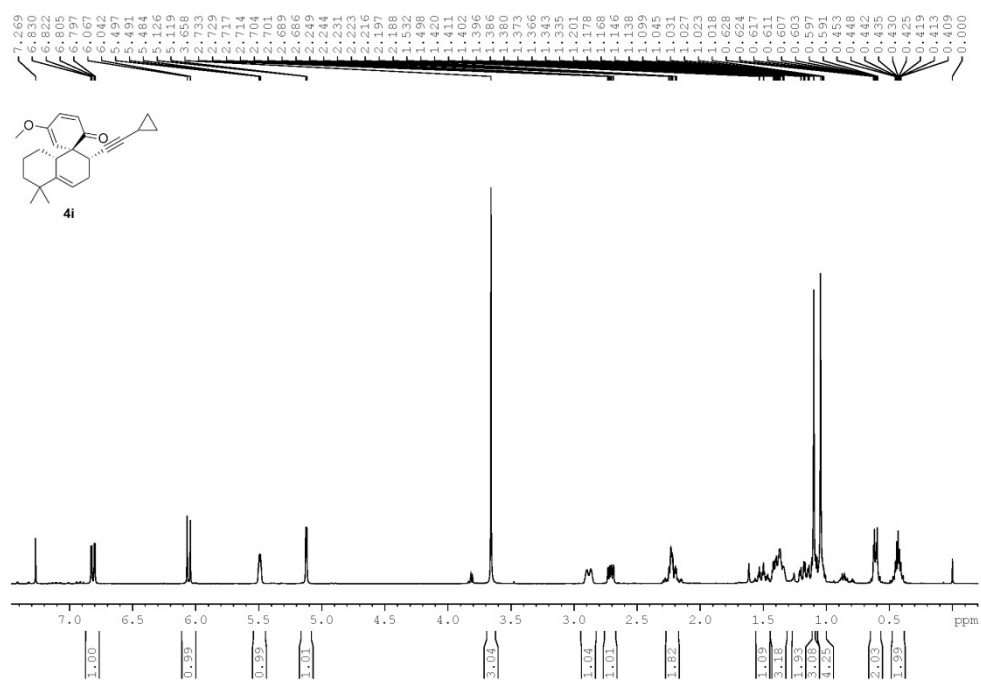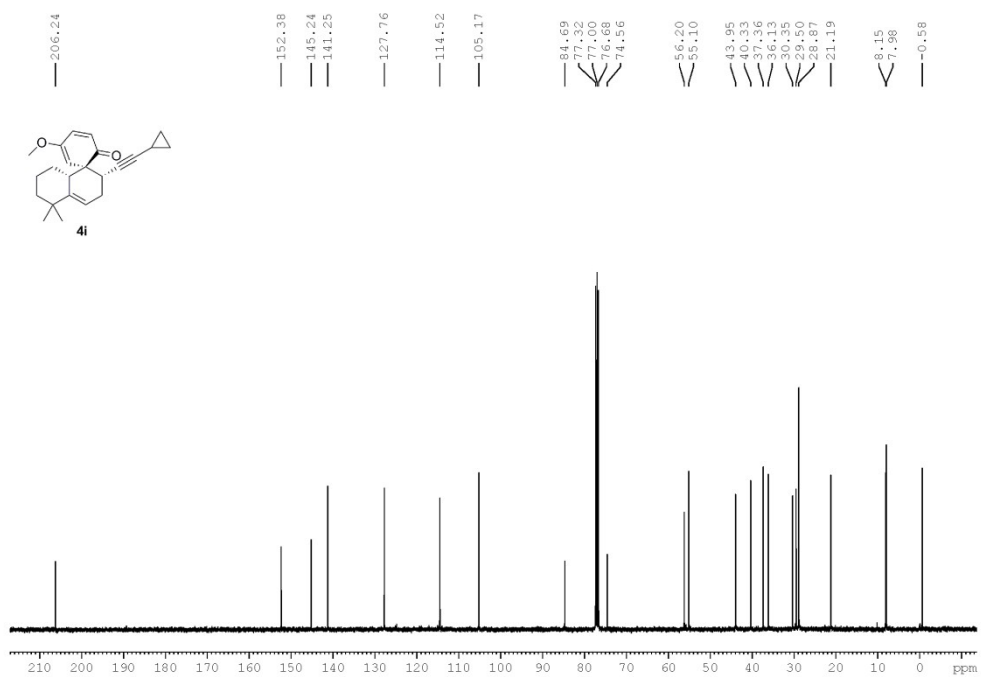

HPLC Spectra of Compound 4i

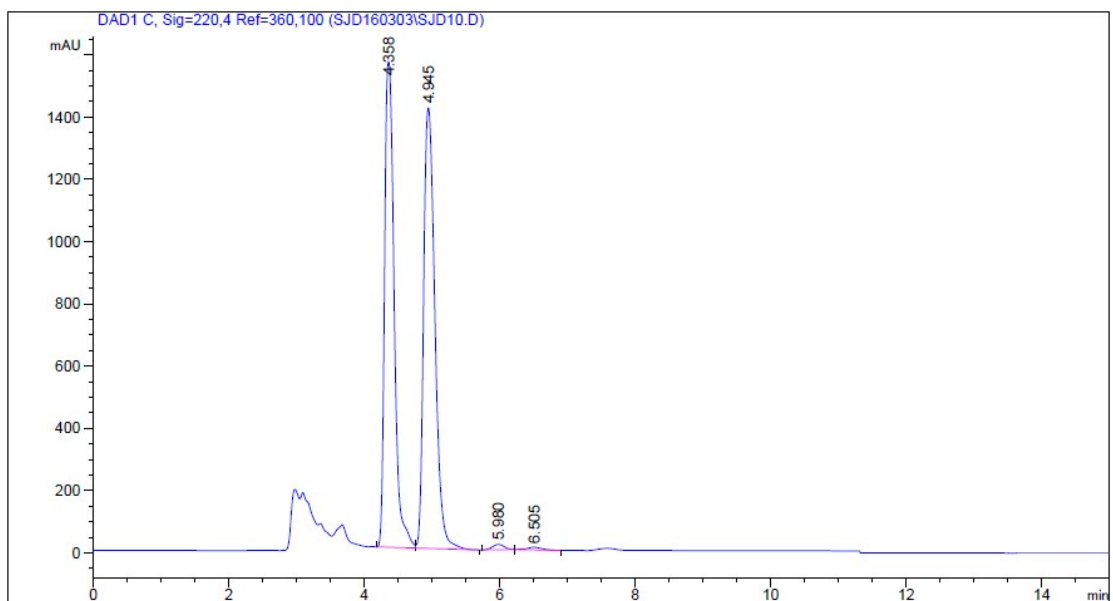

信号 1: DAD1 C, Sig=220, 4 Ref=360, 100

| 峰 # | 保留时间 [min] | 类型 | 峰宽 [min] | 峰面积 [mAU*s] | 峰面积 %   | 名称 |
|-----|------------|----|----------|-------------|---------|----|
| 1   | 4.358      | BV | 0.1540   | 1.52575e4   | 47.9092 | ?  |
| 2   | 4.945      | VB | 0.1820   | 1.62590e4   | 51.0539 | ?  |
| 3   | 5.980      | BB | 0.1925   | 201.99136   | 0.6343  | ?  |
| 4   | 6.505      | BB | 0.2117   | 128.23123   | 0.4027  | ?  |

总量 : 3.18467e4

$^1\text{H}$  and  $^{13}\text{C}$  NMR Spectra of Compound **4j**

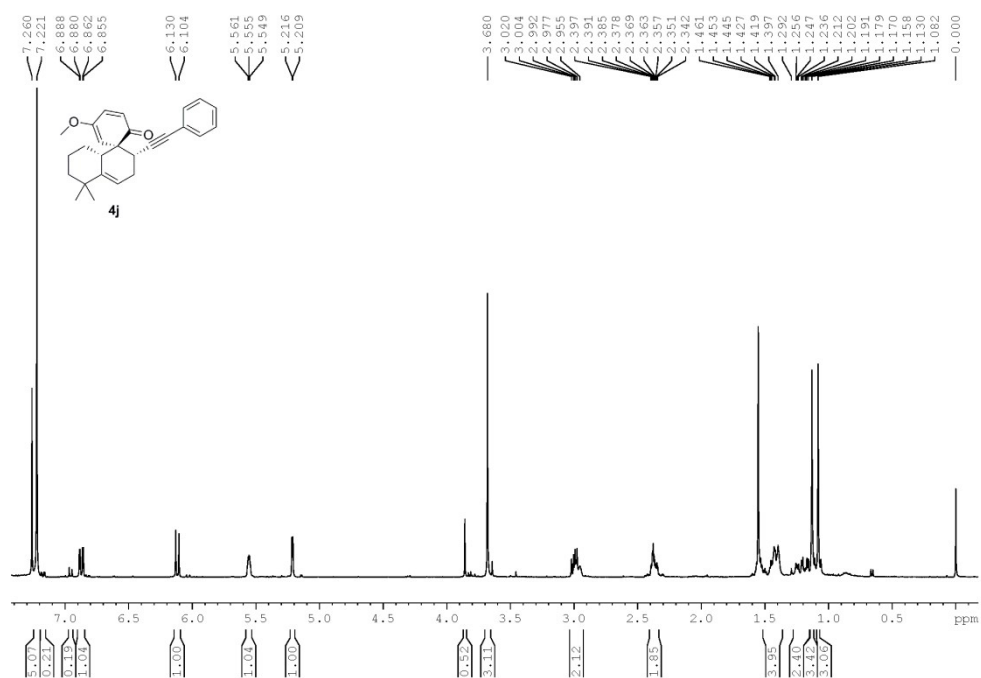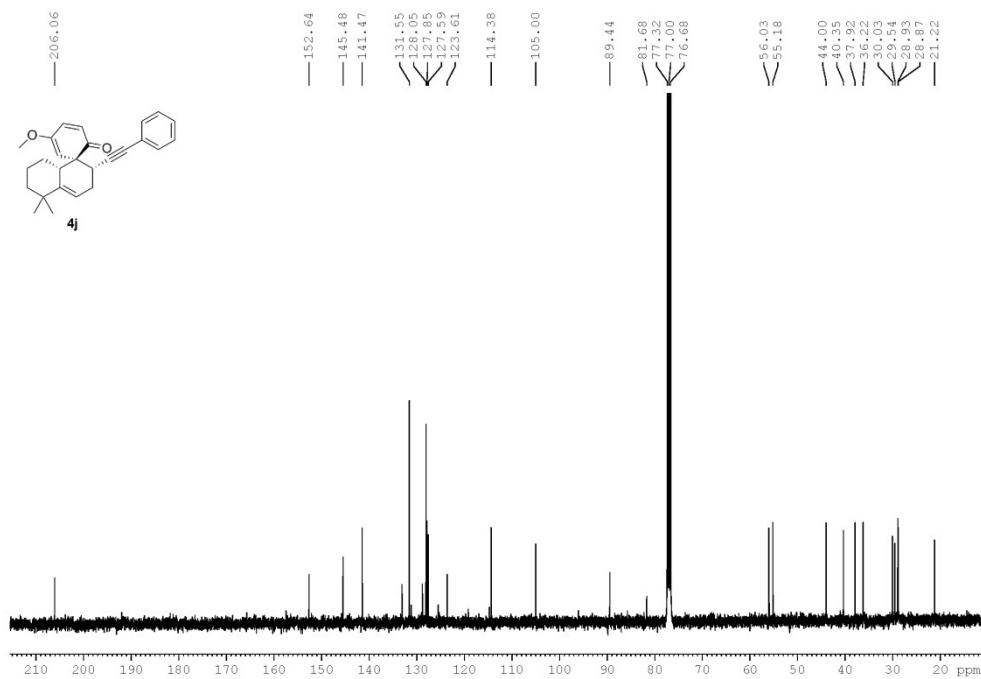

**<sup>1</sup>H and <sup>13</sup>C NMR Spectra of Compound 4k**

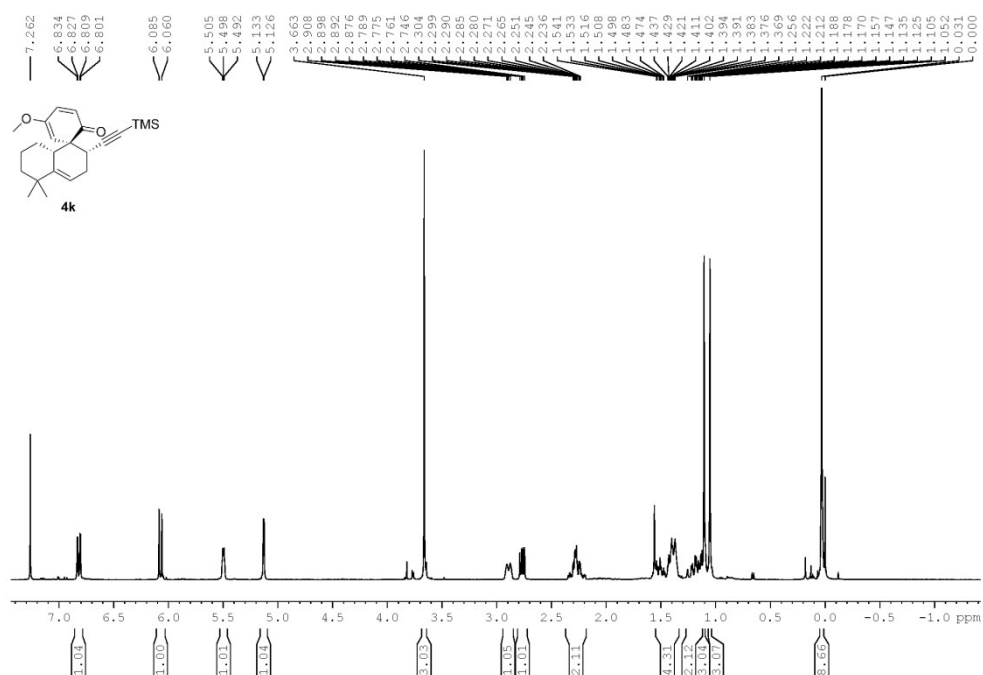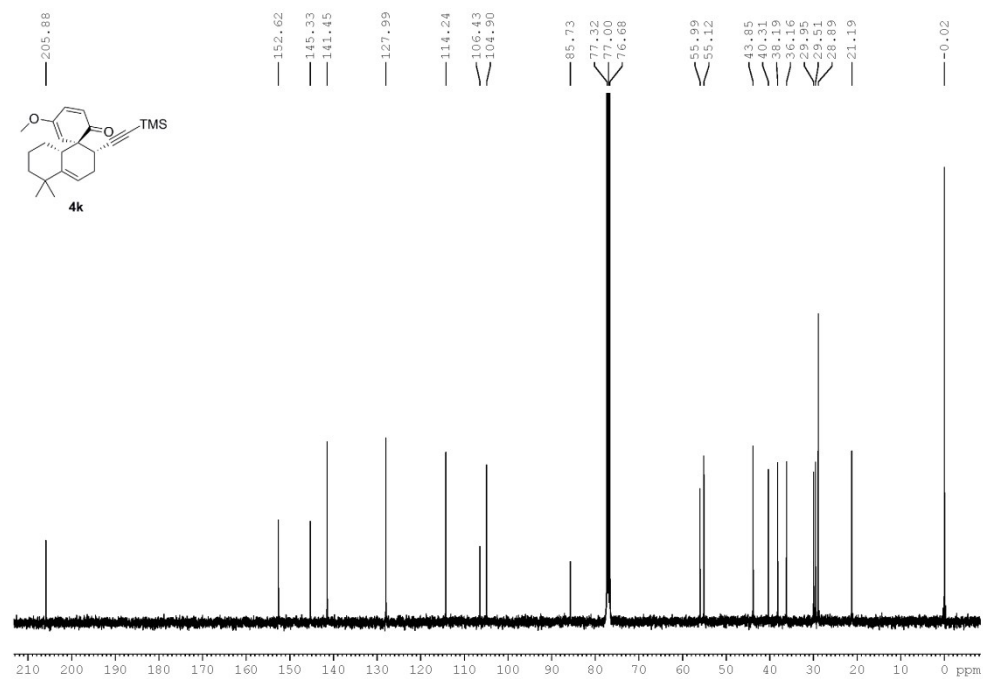

<sup>1</sup>H and <sup>13</sup>C NMR Spectra of Compound **4l-1**



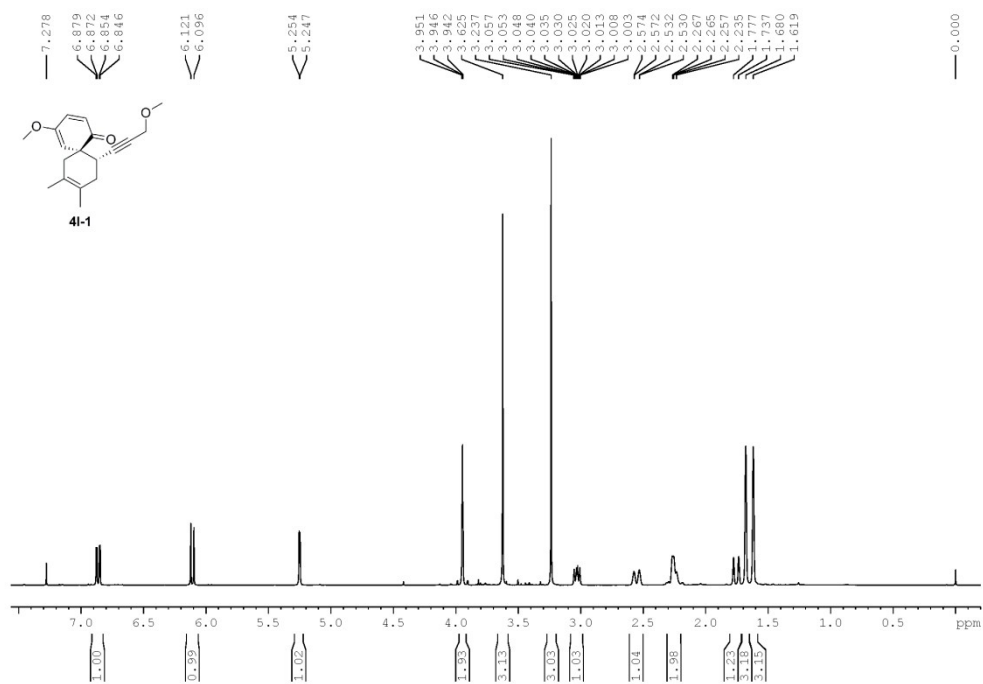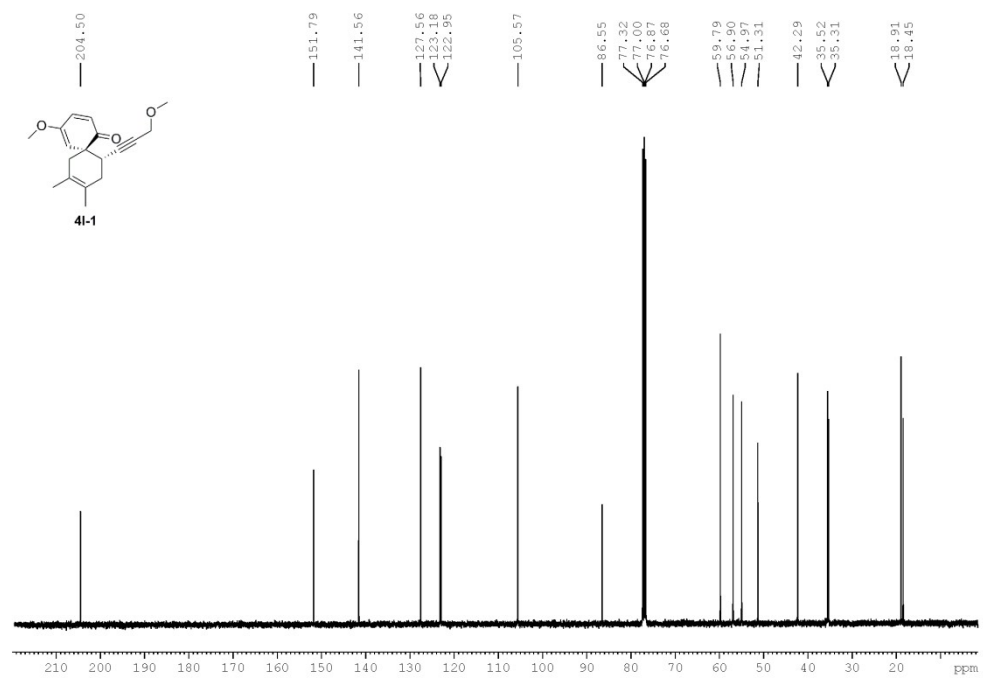

<sup>1</sup>H and <sup>13</sup>C NMR Spectra of Compound 41-2

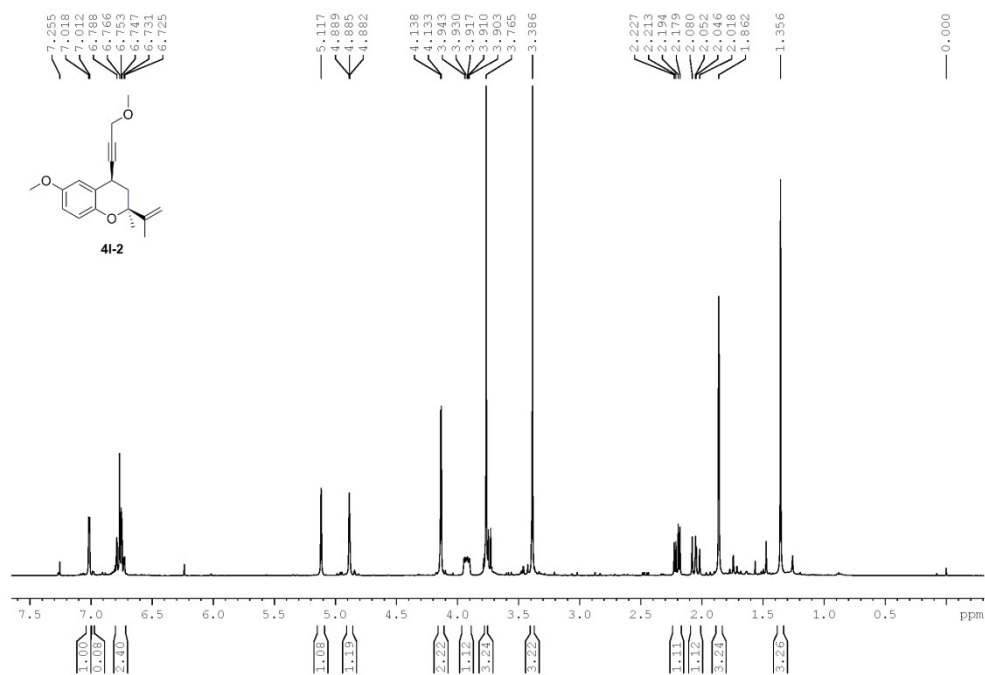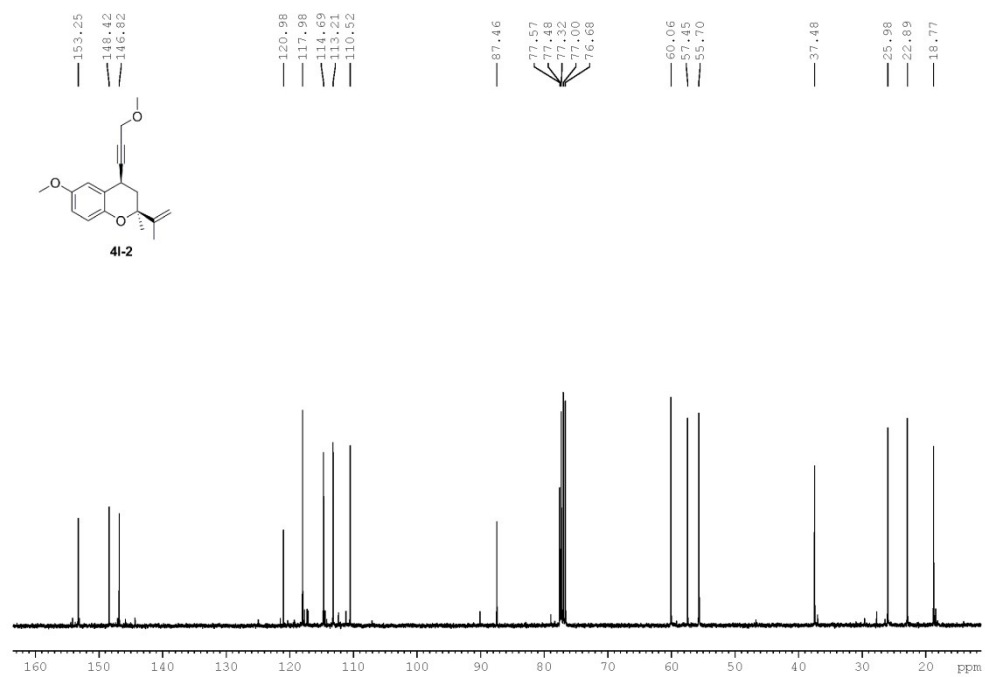

$^1\text{H}$  and  $^{13}\text{C}$  NMR Spectra of Compound **4m-1**

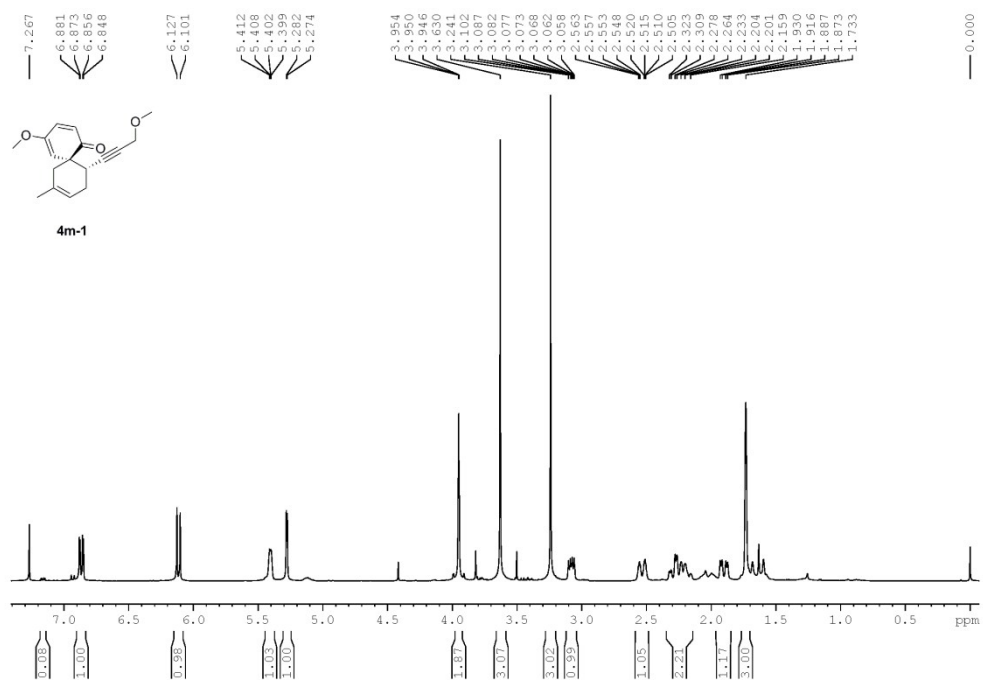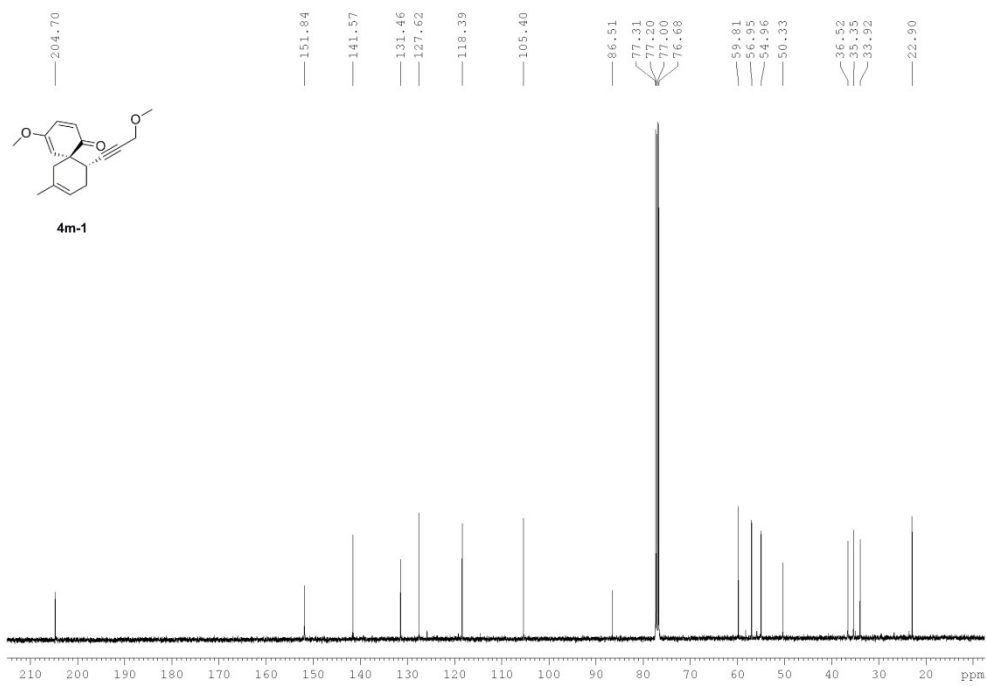

<sup>1</sup>H and <sup>13</sup>C NMR Spectra of Compound **4m-2**

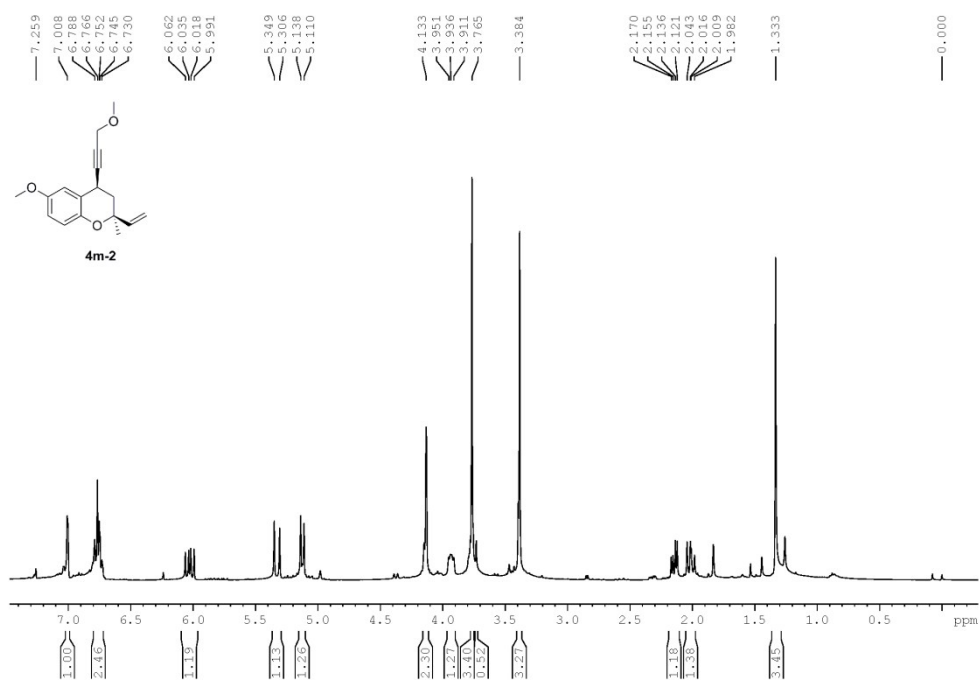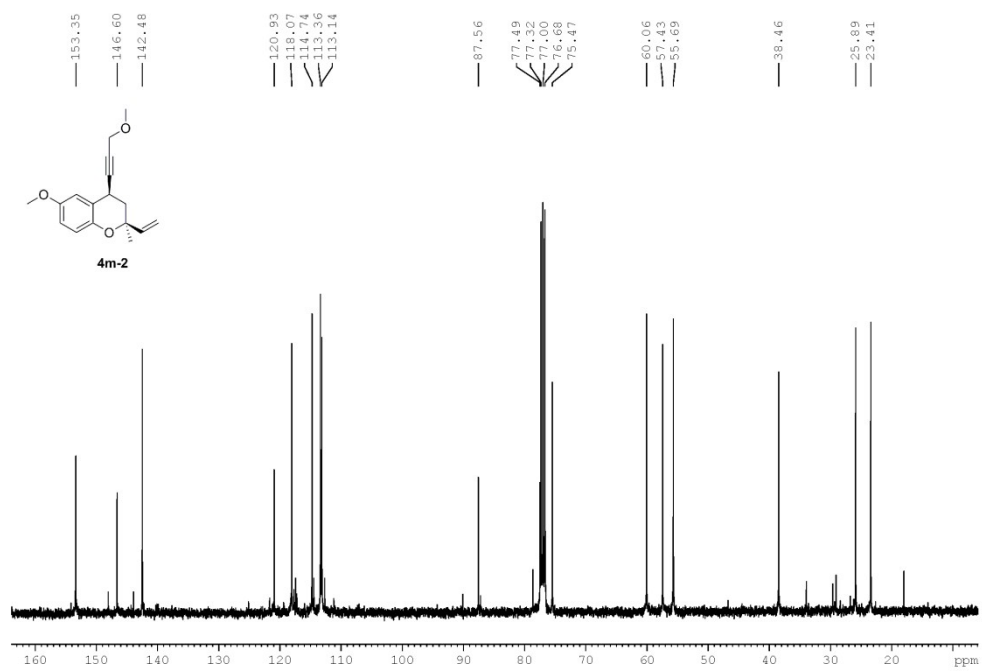

<sup>1</sup>H and <sup>13</sup>C NMR Spectra of Compound 4n-1

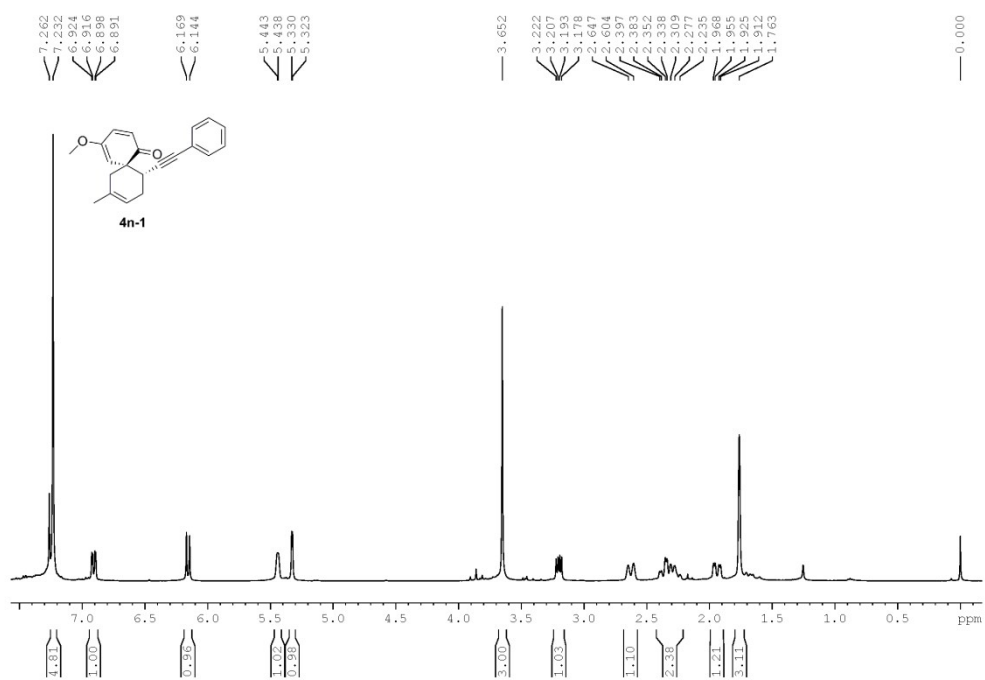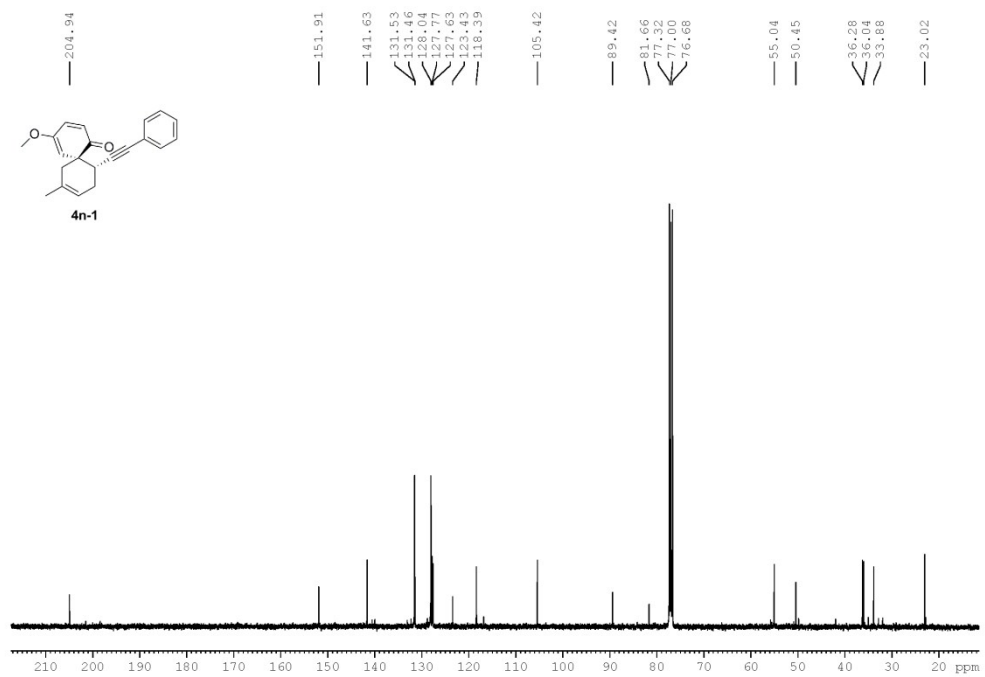

<sup>1</sup>H and <sup>13</sup>C NMR Spectra of Compound **4n-2**

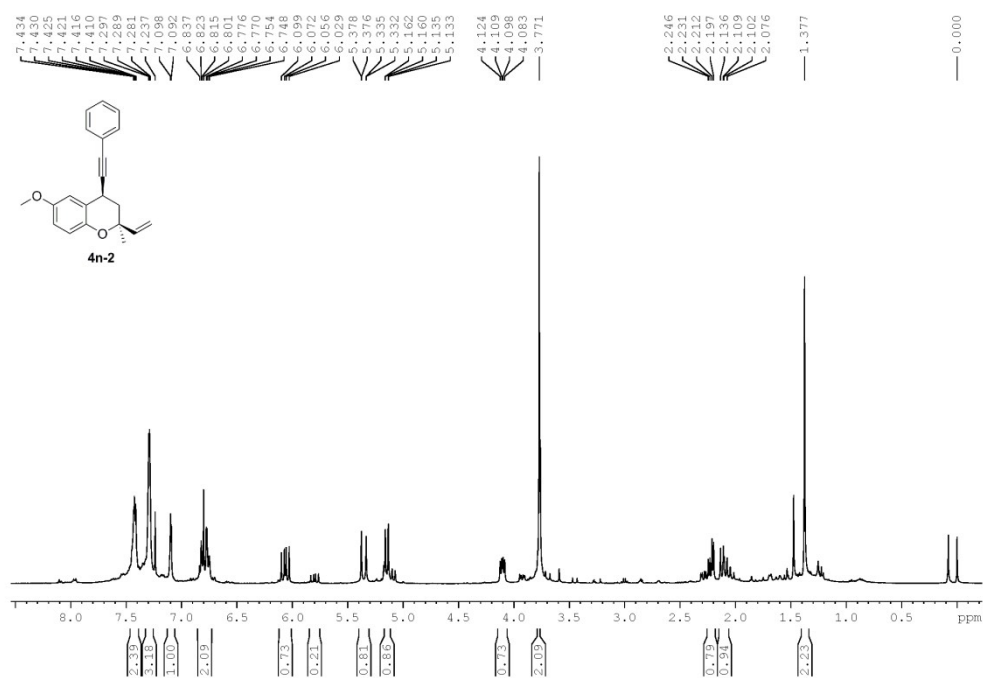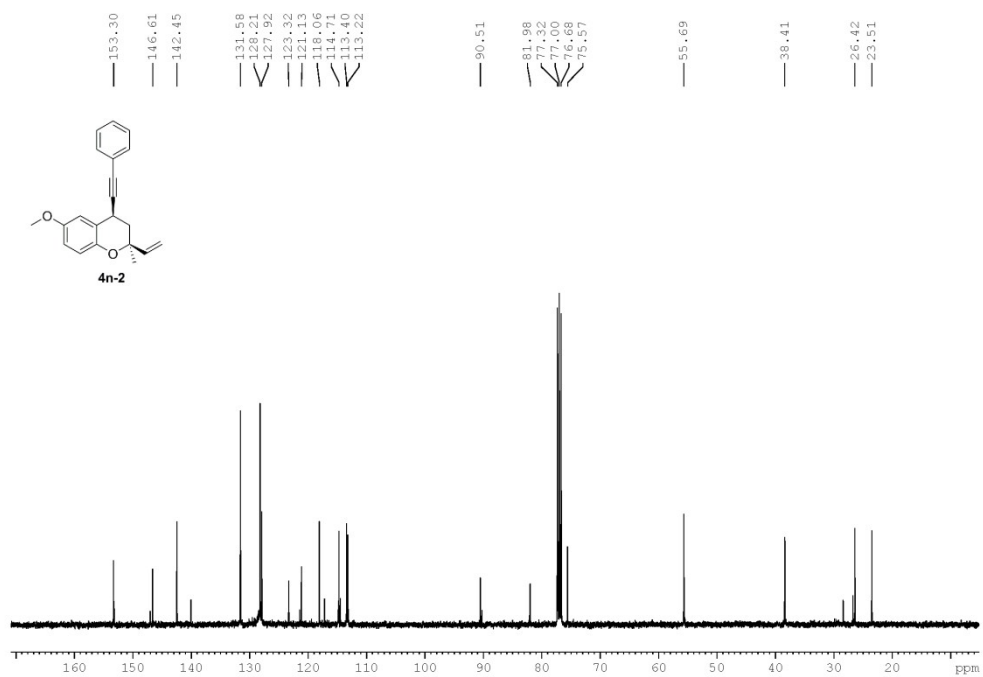

Supplement: c6ra02463g1.pdf [file c6ra02463g1.pdf]
